# Supplementary material for: In situ X-ray diffraction study of the solvothermal formation mechanism of gallium oxide nanoparticles
Source: Royal Society of Chemistry journal article supplement (doi:10.1039/d2nr07128b), 2023-01-01
Supplement: d2nr07128b1.pdf [file d2nr07128b1.pdf]

# ***In situ* X-ray diffraction study of the solvothermal formation mechanism of gallium oxide nanoparticles**

Ida Gjerlevsen Nielsen,<sup>a</sup> Magnus Kløve,<sup>a</sup> Martin Roelsgaard,<sup>a</sup> Ann-Christin Dippel<sup>b</sup> and Bo Brummerstedt Iversen<sup>a,\*</sup>

<sup>a</sup>Center for Integrated Materials Research, Department of Chemistry and iNANO, Aarhus University, 8000 Aarhus C, Denmark

<sup>b</sup>Deutsches Elektronen-Synchrotron DESY, D-22607 Hamburg, Germany

\*Corresponding author: [bo@chem.au.dk](mailto:bo@chem.au.dk)

## **Contents**

|                                                                                 |    |
|---------------------------------------------------------------------------------|----|
| Temperature calibrations .....                                                  | 2  |
| Time resolved data of the solvothermal gallium oxide synthesis .....            | 3  |
| Examples of Rietveld fits .....                                                 | 12 |
| Extracted values from Rietveld refinements .....                                | 15 |
| Refinement of the $\gamma$ -Ga <sub>2</sub> O <sub>3</sub> .....                | 24 |
| Kinetic analysis of the $\beta$ -Ga <sub>2</sub> O <sub>3</sub> formation ..... | 27 |
| References .....                                                                | 28 |

## Temperature calibrations

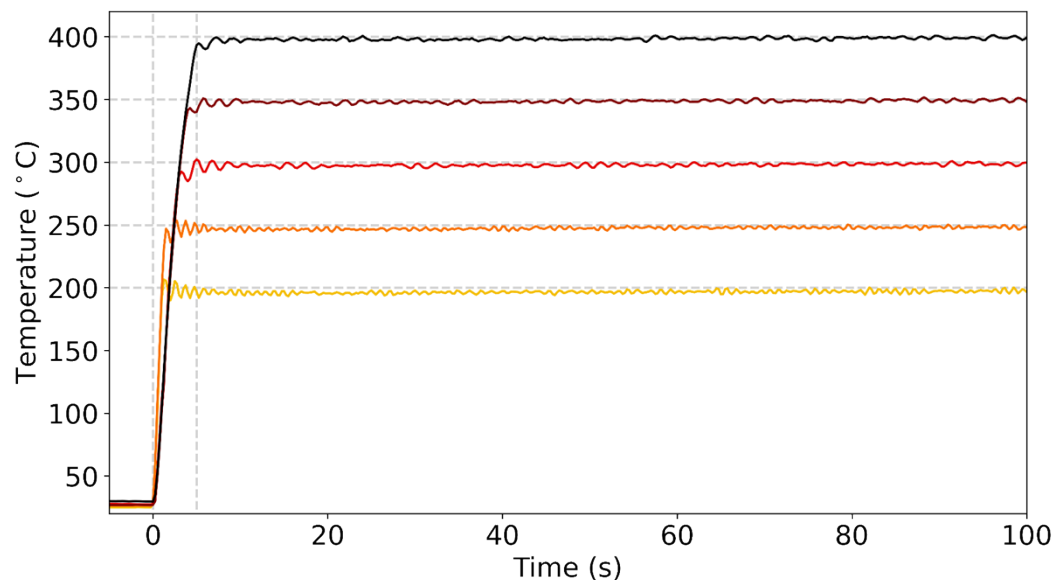

**Figure S1.** Temperature calibration and heating profile for the *in situ* solvothermal setup for the experiments with fast heating and water or ethanol as solvent. All three experiments with slow heating used this temperature calibration, but slower heating profile, aiming for 10°C/min as illustrated along with the data in Figure S8, S14 and S20.

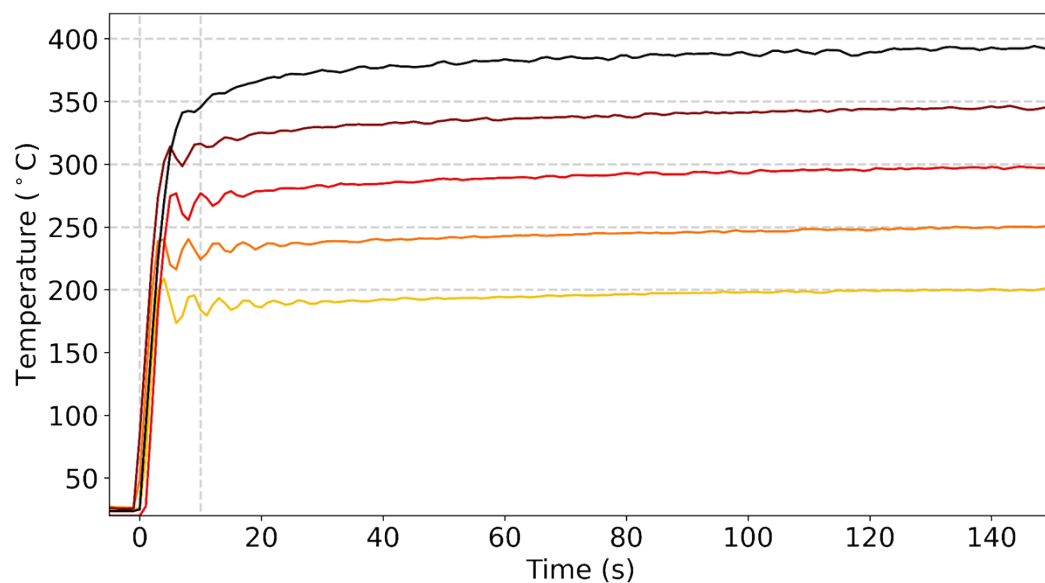

**Figure S2.** Temperature calibration and heating profile for the *in situ* solvothermal setup for experiments with fast heating and aqueous NaOH as solvent.

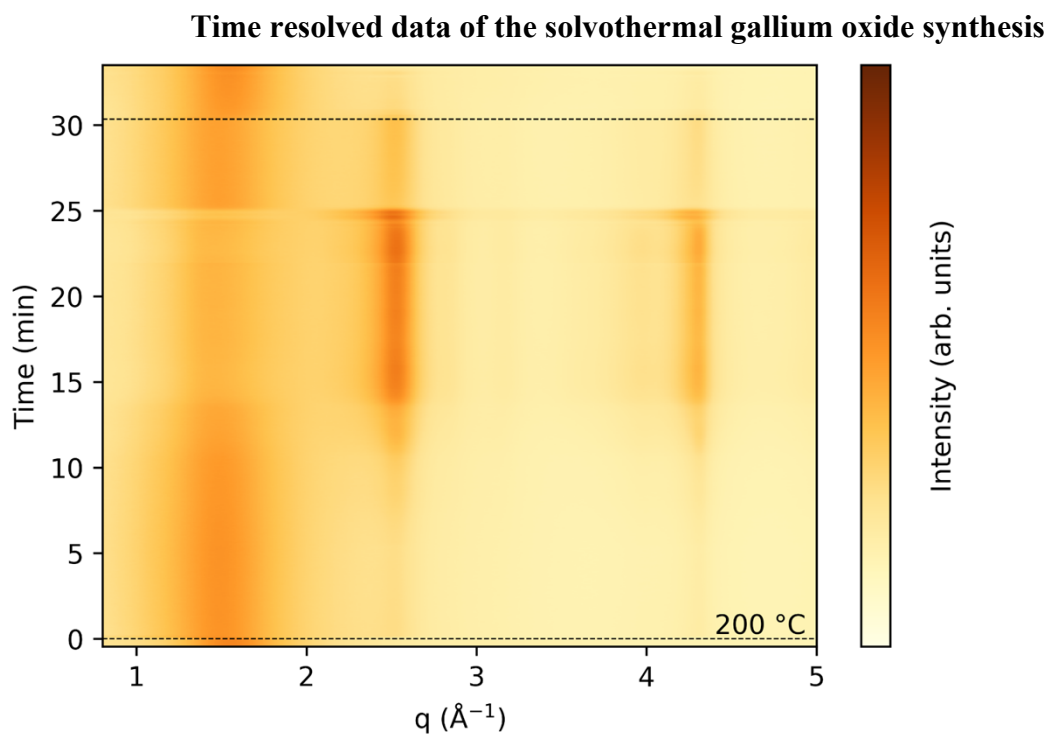

**Figure S3.** Time-resolved scattering data for the direct heating of  $\text{Ga}(\text{NO}_3)_3$  in ethanol to 200°C.

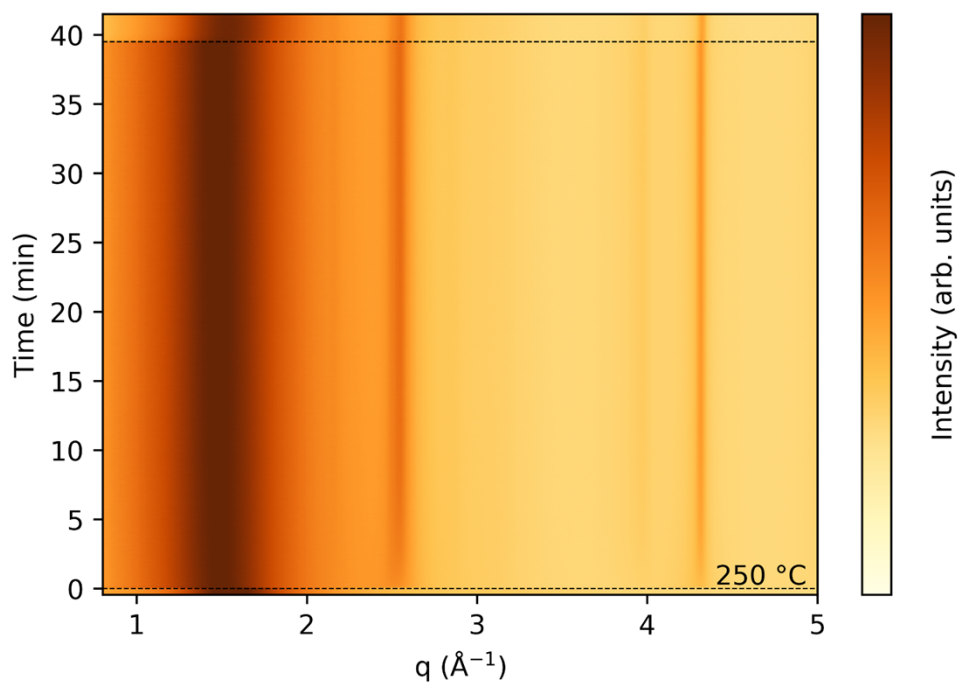

**Figure S4.** Time-resolved scattering data for the direct heating of  $\text{Ga}(\text{NO}_3)_3$  in ethanol to 250°C.

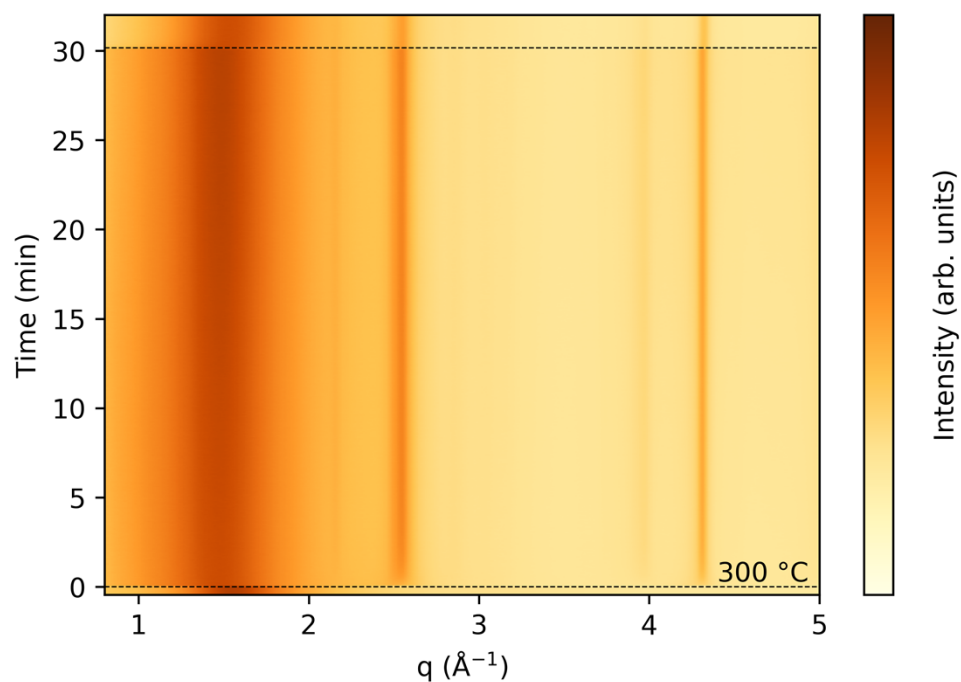

**Figure S5.** Time-resolved scattering data for the direct heating of Ga(NO<sub>3</sub>)<sub>3</sub> in ethanol to 300°C.

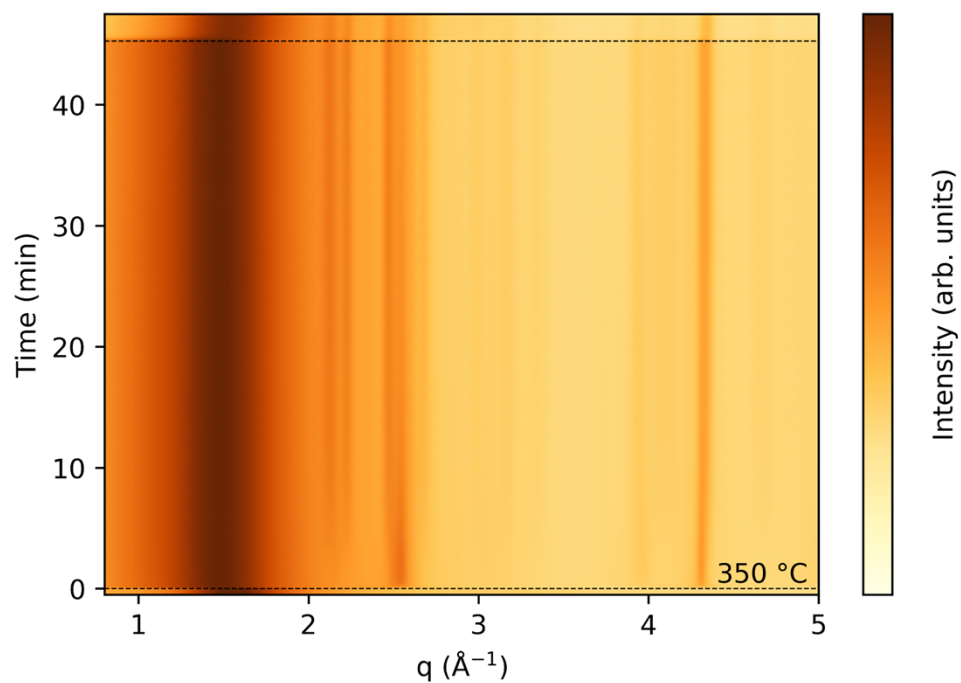

**Figure S6.** Time-resolved scattering data for the direct heating of Ga(NO<sub>3</sub>)<sub>3</sub> in ethanol to 350°C (EtOH\_350).



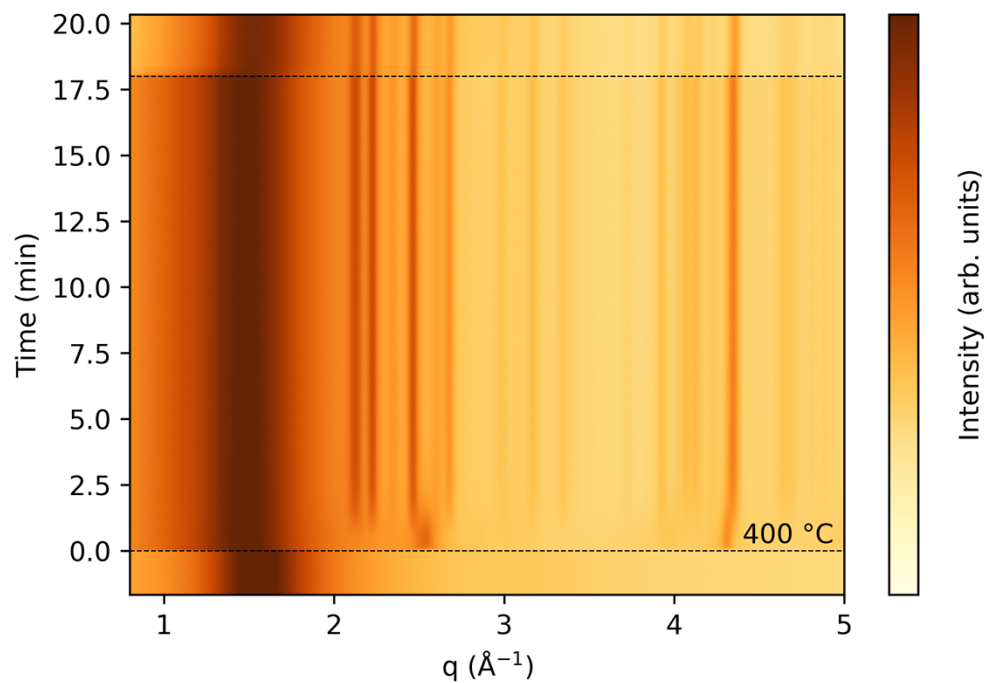

**Figure S7.** Time-resolved scattering data for the direct heating of  $\text{Ga}(\text{NO}_3)_3$  in ethanol to  $400^\circ\text{C}$  (EtOH\_400).

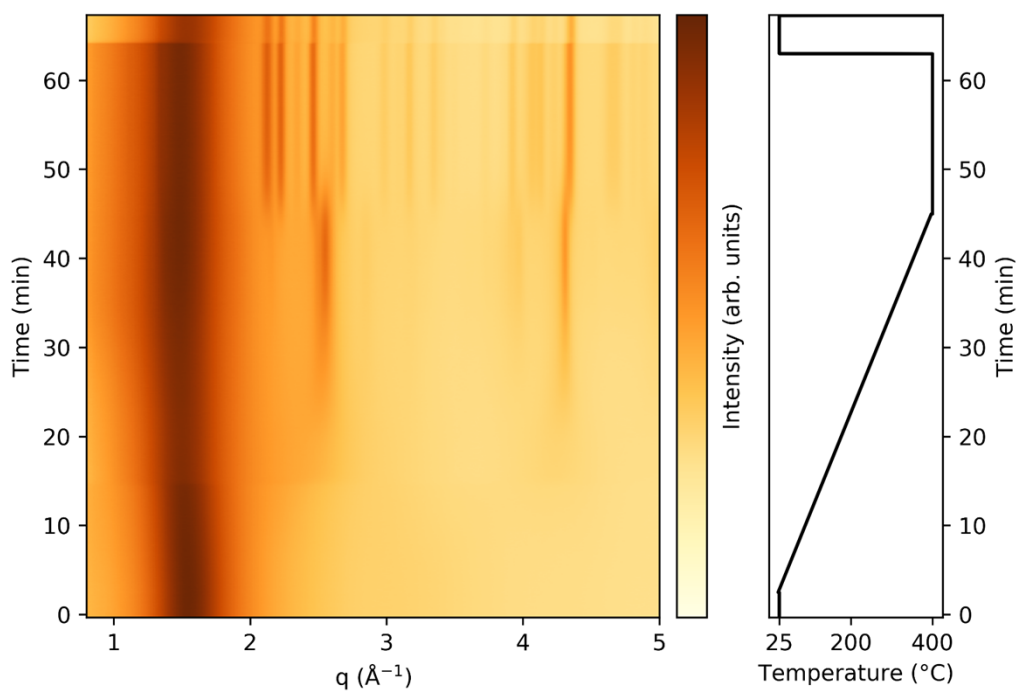

**Figure S8.** Time-resolved scattering data for the ramp heating of  $\text{Ga}(\text{NO}_3)_3$  in ethanol to  $400^\circ\text{C}$  with the used heating profile.

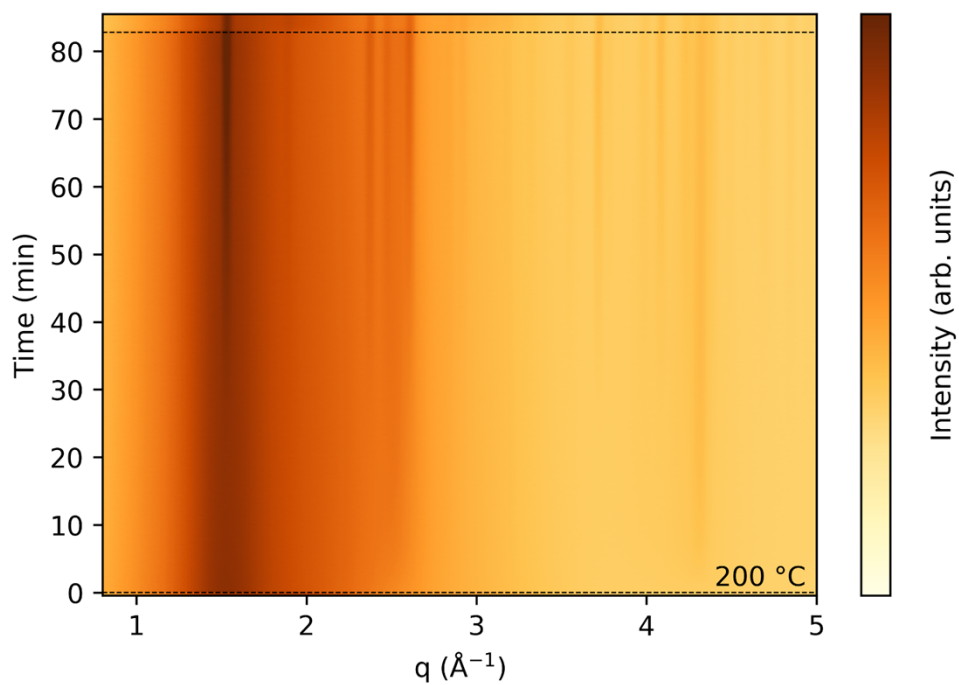

**Figure S9.** Time-resolved scattering data for the direct heating of Ga(NO<sub>3</sub>)<sub>3</sub> in water to 200°C (H2O\_200).

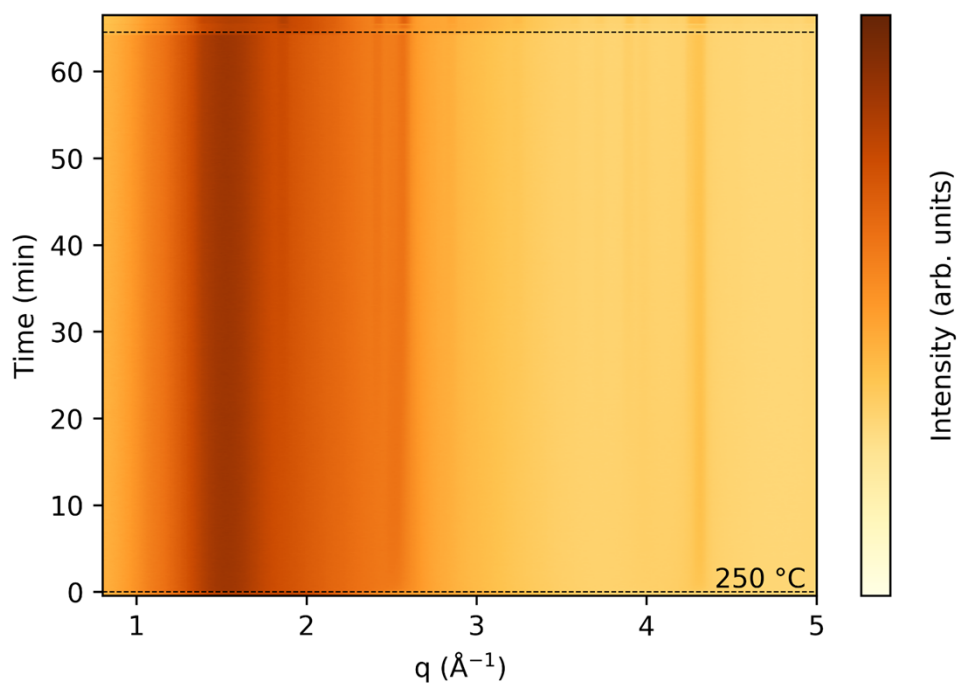

**Figure S10.** Time-resolved scattering data for the direct heating of Ga(NO<sub>3</sub>)<sub>3</sub> in water to 250°C.

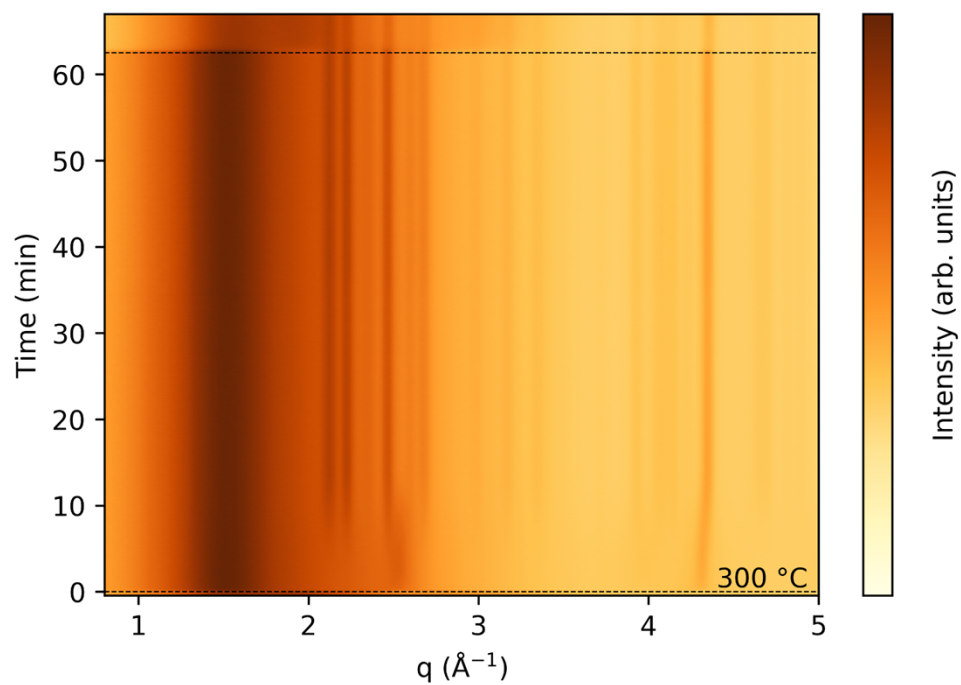

**Figure S11.** Time-resolved scattering data for the direct heating of Ga(NO<sub>3</sub>)<sub>3</sub> in water to 300°C.

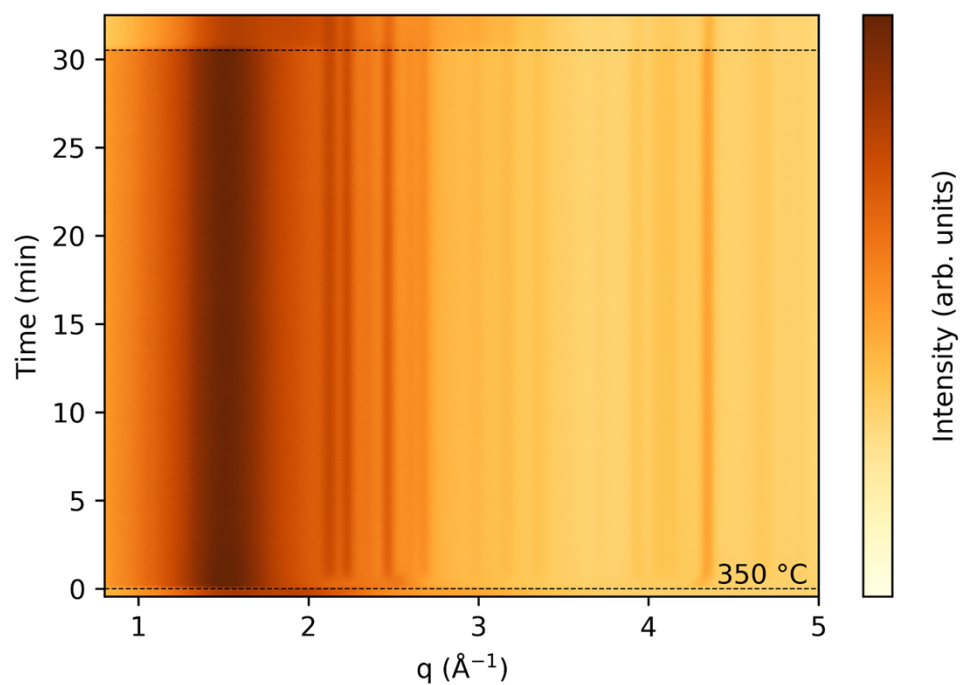

**Figure S12.** Time-resolved scattering data for the direct heating of Ga(NO<sub>3</sub>)<sub>3</sub> in water to 350°C.

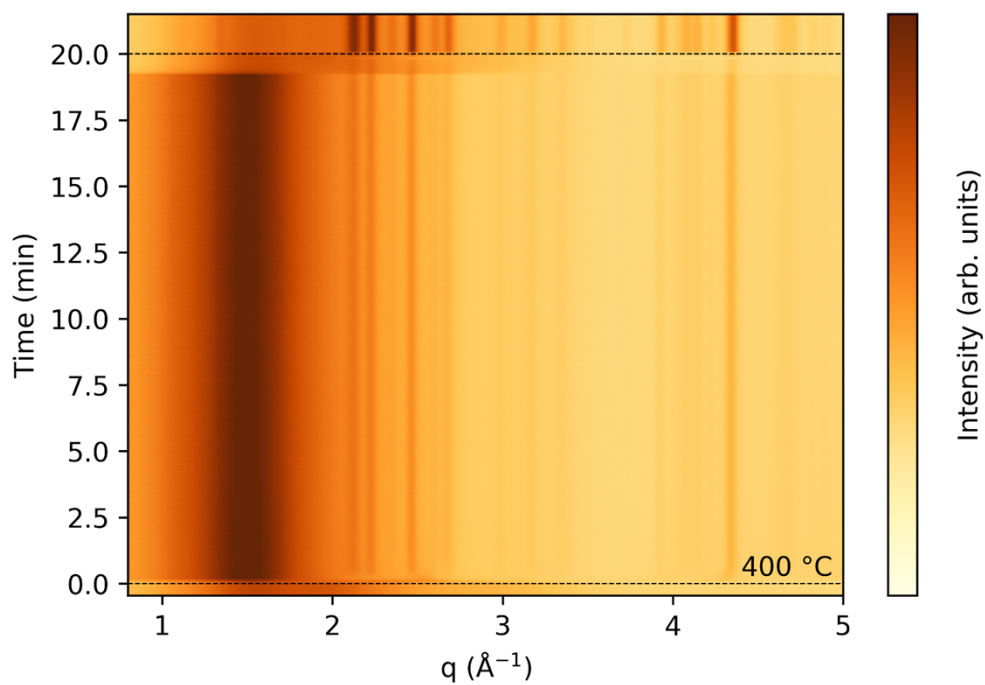

**Figure S13.** Time-resolved scattering data for the direct heating of  $\text{Ga}(\text{NO}_3)_3$  in water to  $400^\circ\text{C}$ .

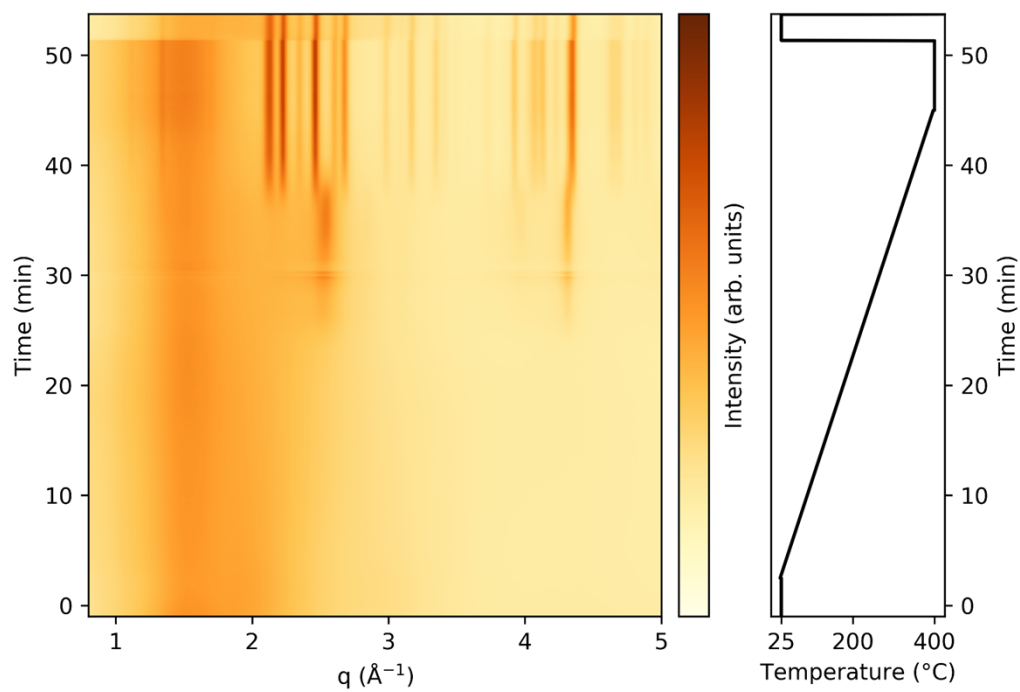

**Figure S14.** Time-resolved scattering data for the ramp heating of  $\text{Ga}(\text{NO}_3)_3$  in water to  $400^\circ\text{C}$  with the used heating profile.

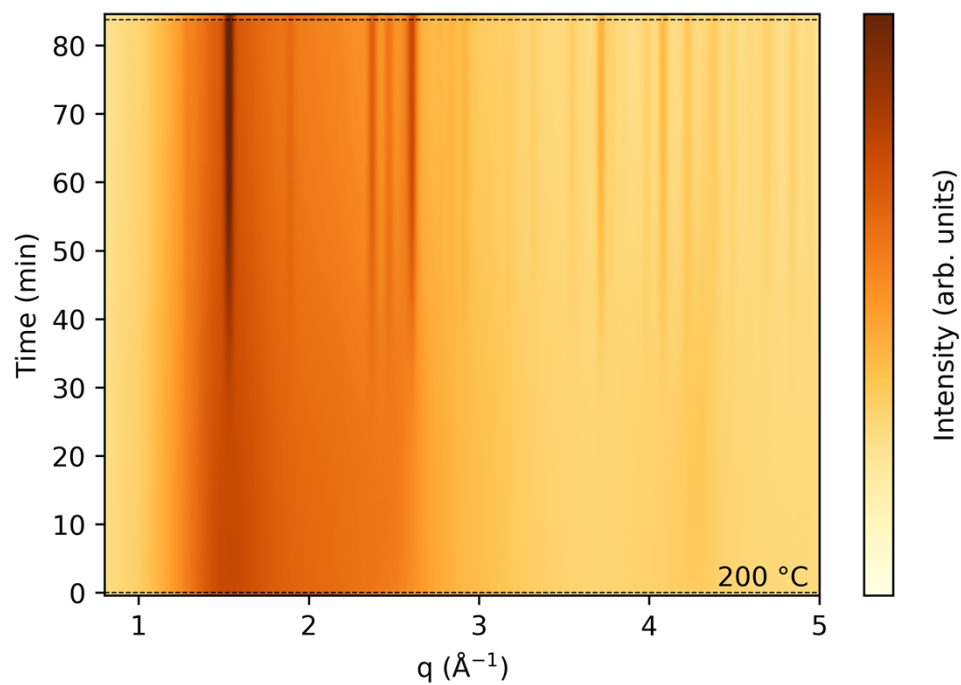

**Figure S15.** Time-resolved scattering data for the direct heating of Ga(NO<sub>3</sub>)<sub>3</sub> in water with added NaOH to 200°C.

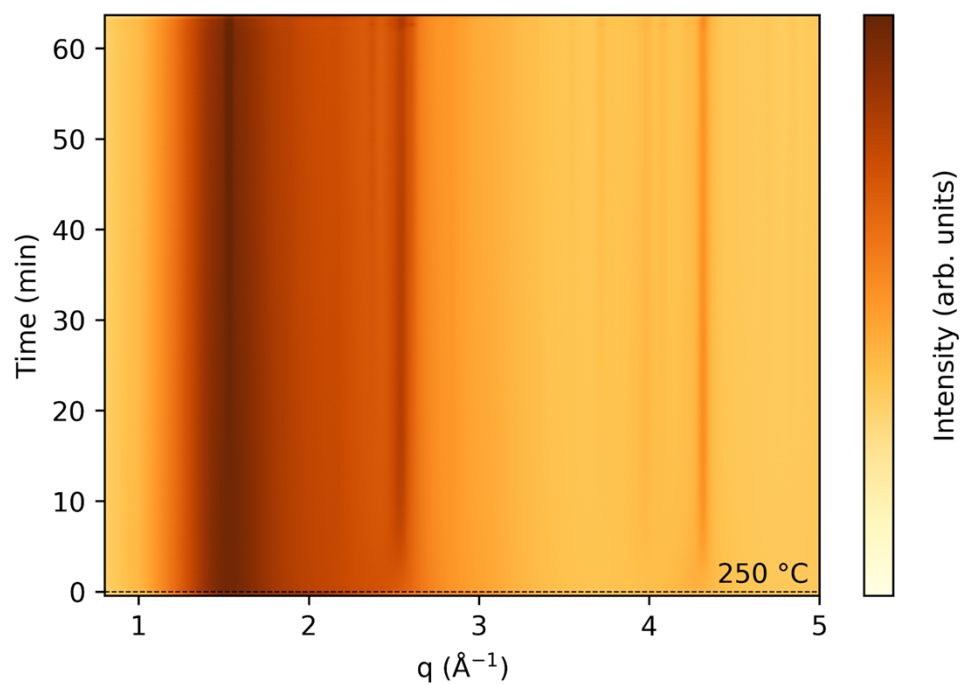

**Figure S16.** Time-resolved scattering data for the direct heating of Ga(NO<sub>3</sub>)<sub>3</sub> in water with added NaOH to 250°C.

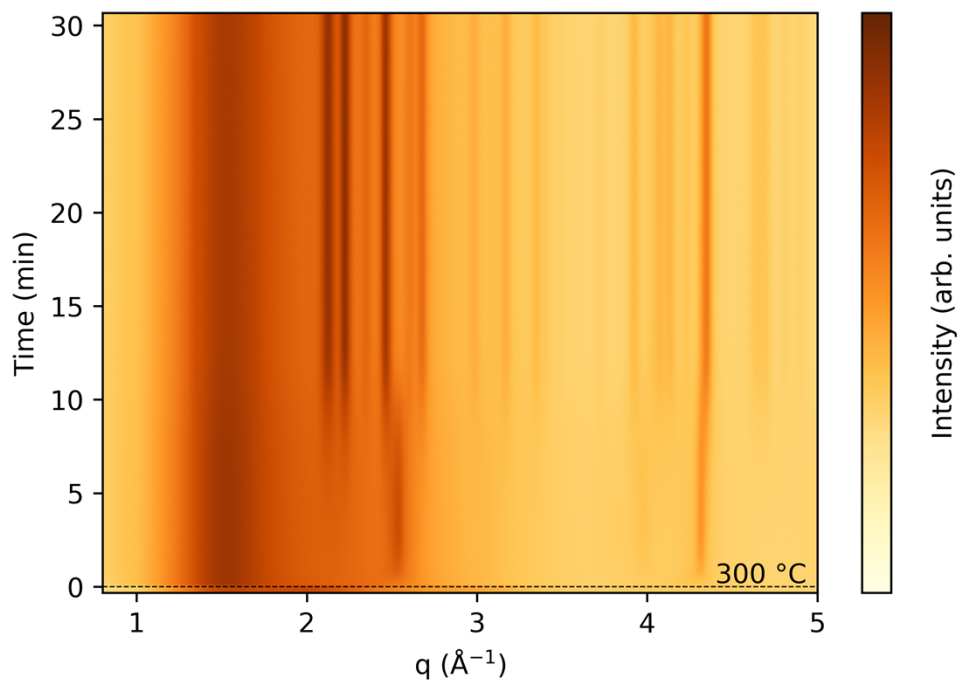

**Figure S17.** Time-resolved scattering data for the direct heating of Ga(NO<sub>3</sub>)<sub>3</sub> in water with added NaOH to 300°C.

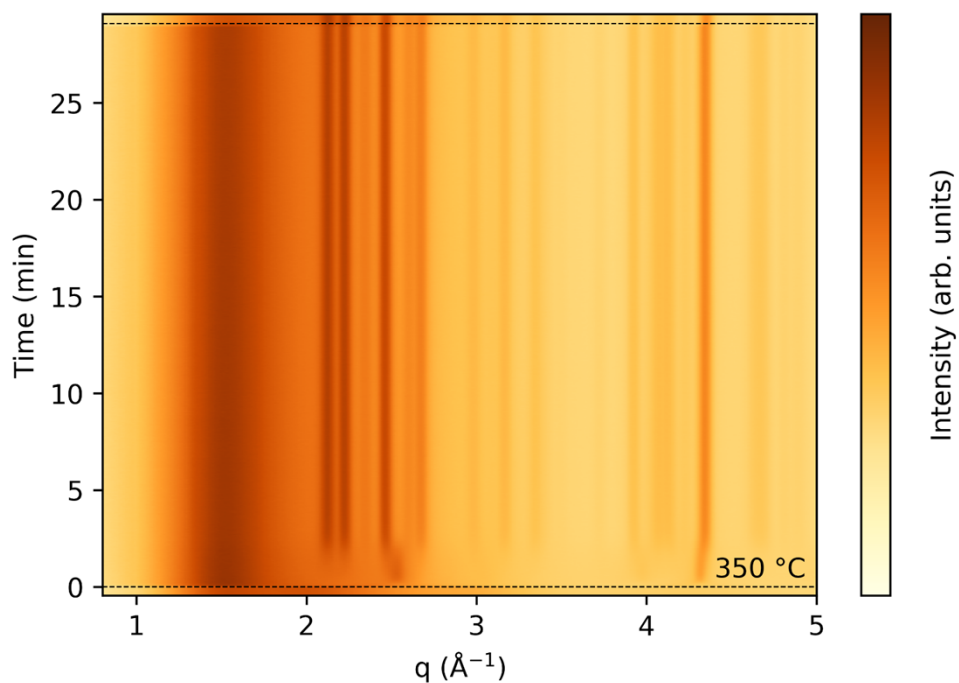

**Figure S18.** Time-resolved scattering data for the direct heating of Ga(NO<sub>3</sub>)<sub>3</sub> in water with added NaOH to 350°C.

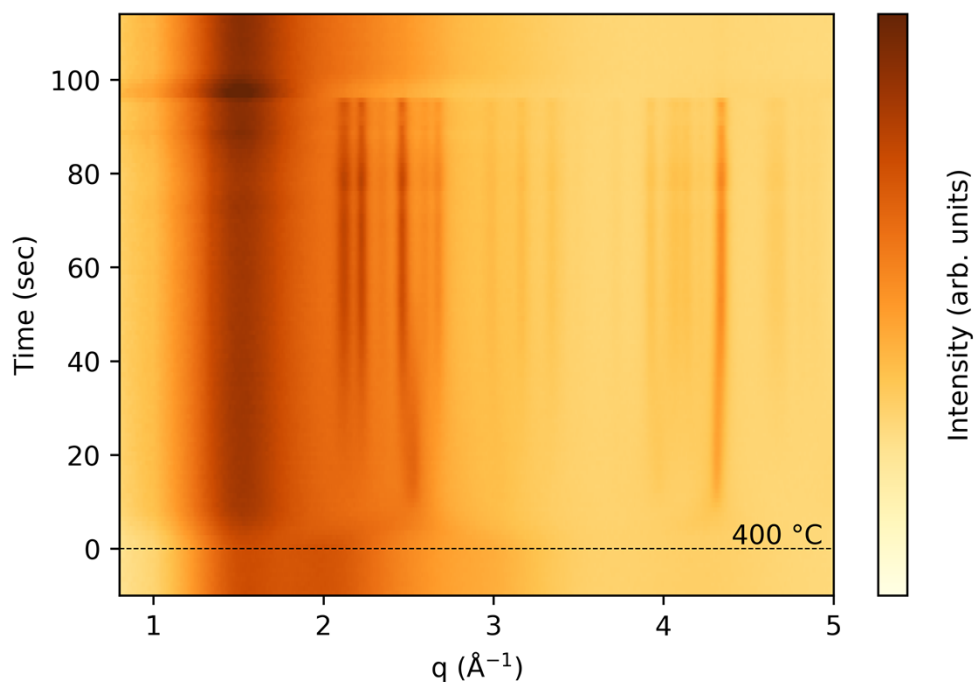

**Figure S19.** Time-resolved scattering data for the direct heating of  $\text{Ga}(\text{NO}_3)_3$  in water with added NaOH to  $400^\circ\text{C}$ .

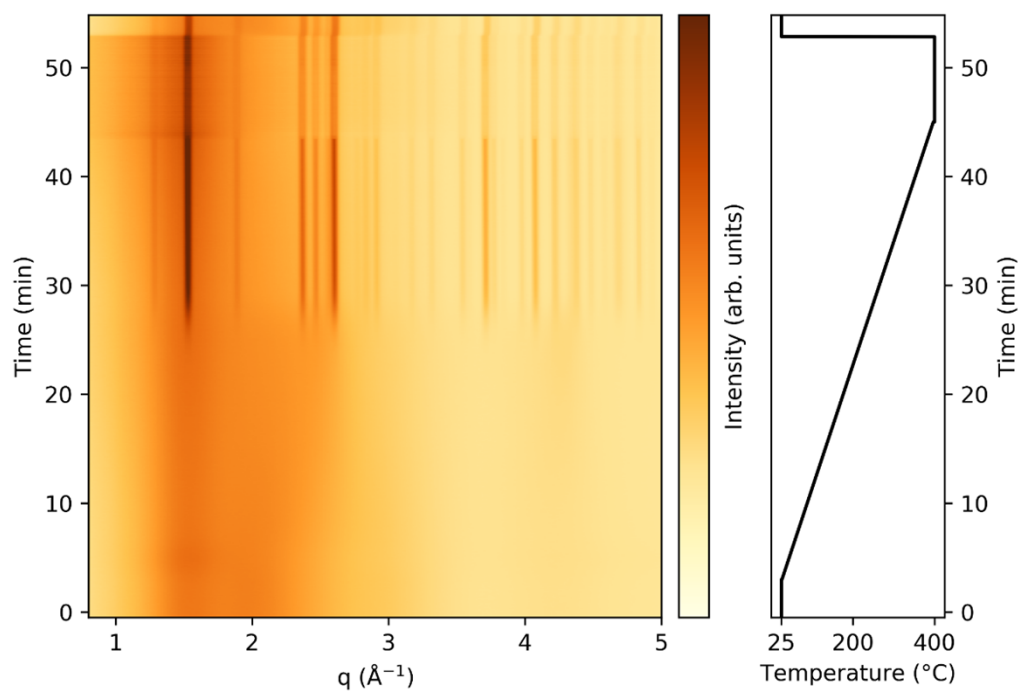

**Figure S20.** Time-resolved scattering data for the ramp heating of  $\text{Ga}(\text{NO}_3)_3$  in water with added NaOH to  $400^\circ\text{C}$  with the used heating profile.



## Examples of Rietveld fits

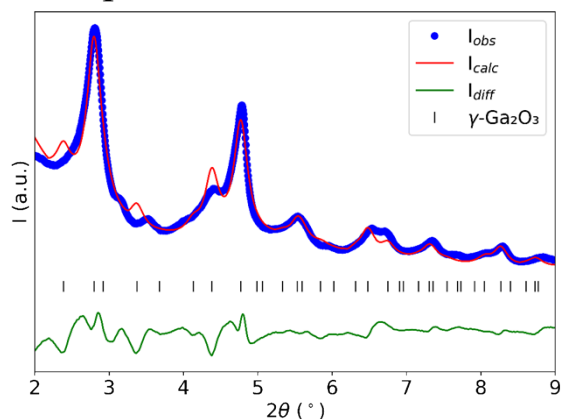

**Figure S21.** Rietveld refinement of the last frame of heating for Ga(NO<sub>3</sub>)<sub>3</sub> in ethanol at 200°C. The refinement show  $\gamma$ -Ga<sub>2</sub>O<sub>3</sub>

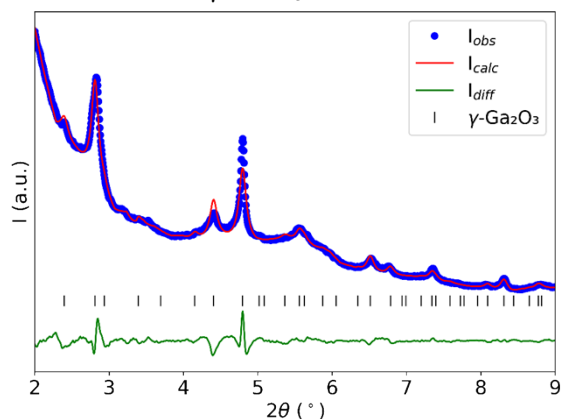

**Figure S22.** Rietveld refinement of the last frame of heating for Ga(NO<sub>3</sub>)<sub>3</sub> in ethanol at 250°C. The refinement show  $\gamma$ -Ga<sub>2</sub>O<sub>3</sub>

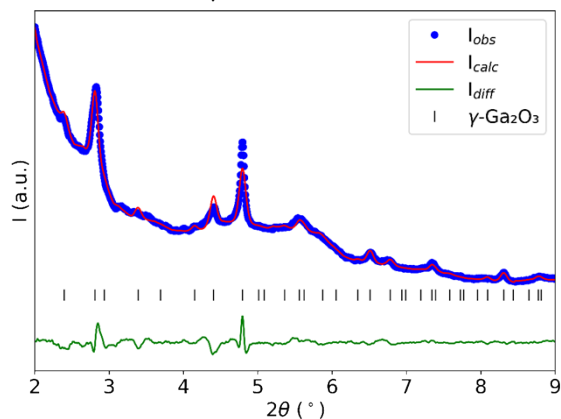

**Figure S23.** Rietveld refinement of the last frame of heating for Ga(NO<sub>3</sub>)<sub>3</sub> in ethanol at 300°C. The refinement show  $\gamma$ -Ga<sub>2</sub>O<sub>3</sub>

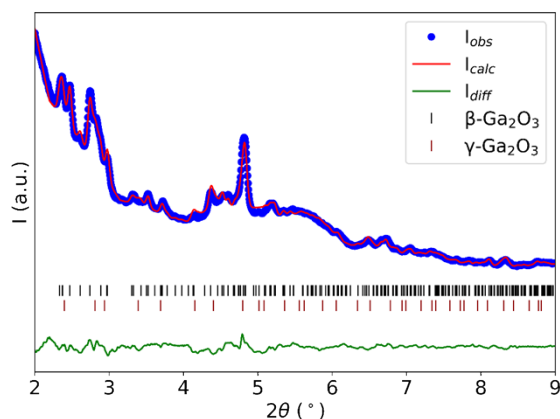

**Figure S24.** Rietveld refinement of the last frame of heating for Ga(NO<sub>3</sub>)<sub>3</sub> in ethanol at 350°C. The refinement show  $\beta$ -Ga<sub>2</sub>O<sub>3</sub> and  $\gamma$ -Ga<sub>2</sub>O<sub>3</sub>.

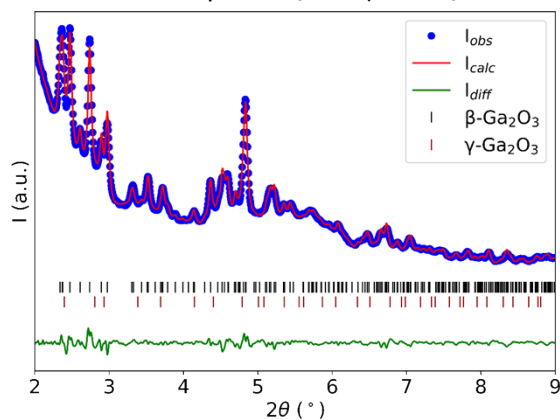

**Figure S25.** Rietveld refinement of the last frame of heating for Ga(NO<sub>3</sub>)<sub>3</sub> in ethanol at 400°C. The refinement show phase pure  $\beta$ -Ga<sub>2</sub>O<sub>3</sub>.

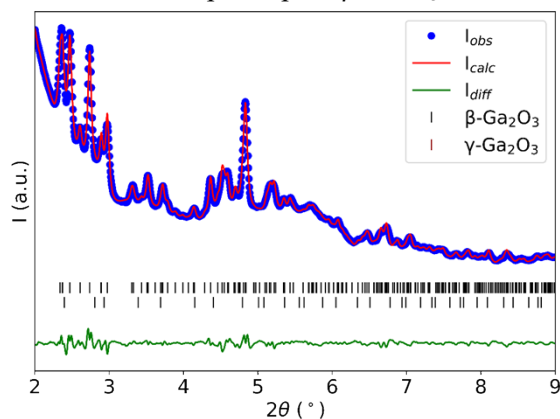

**Figure S26.** Rietveld refinement of the last frame of heating after ramp heating for Ga(NO<sub>3</sub>)<sub>3</sub> in ethanol at 400°C. The refinement show phase pure  $\beta$ -Ga<sub>2</sub>O<sub>3</sub>.



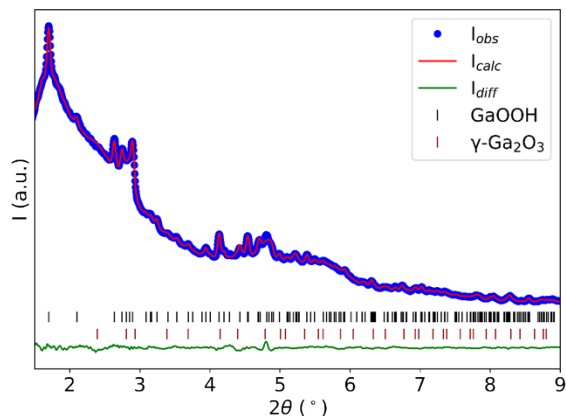

**Figure S27.** Rietveld refinement of the last frame of heating for  $\text{Ga}(\text{NO}_3)_3$  in water at  $200^\circ\text{C}$ . The refinement show a mixture of  $\text{GaOOH}$  and  $\gamma\text{-Ga}_2\text{O}_3$ .

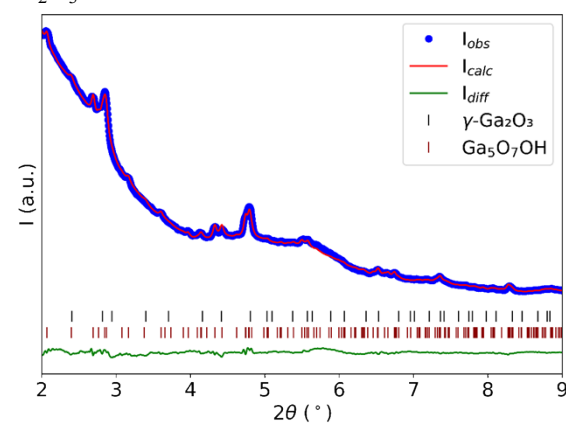

**Figure S28.** Rietveld refinement of the last frame of heating for  $\text{Ga}(\text{NO}_3)_3$  in water at  $250^\circ\text{C}$ . The refinement show a mixture of  $\text{Ga}_5\text{O}_7\text{OH}$  and  $\gamma\text{-Ga}_2\text{O}_3$ .

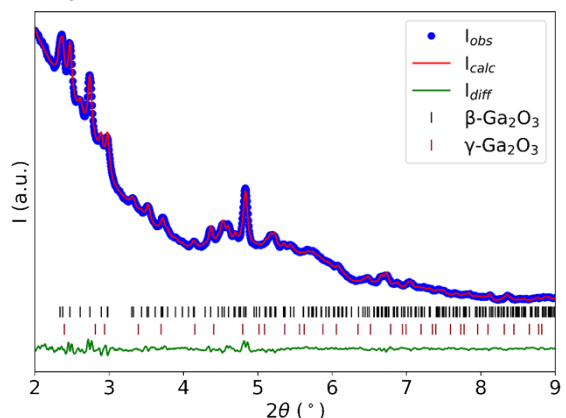

**Figure S29.** Rietveld refinement of the last frame of heating for  $\text{Ga}(\text{NO}_3)_3$  in water at  $300^\circ\text{C}$ . The refinement show phase pure  $\beta\text{-Ga}_2\text{O}_3$ .

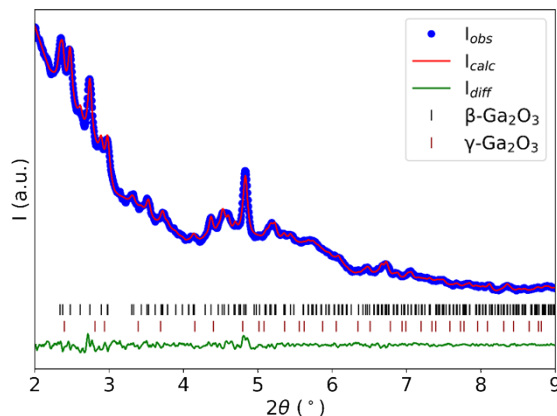

**Figure S30.** Rietveld refinement of the last frame of heating for  $\text{Ga}(\text{NO}_3)_3$  in water at  $350^\circ\text{C}$ . The refinement show phase pure  $\beta\text{-Ga}_2\text{O}_3$ .

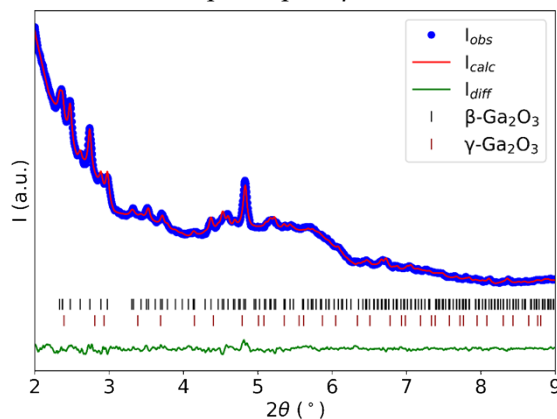

**Figure S31.** Rietveld refinement of the last frame of heating for  $\text{Ga}(\text{NO}_3)_3$  in water at  $400^\circ\text{C}$ . The refinement show phase pure  $\beta\text{-Ga}_2\text{O}_3$ .

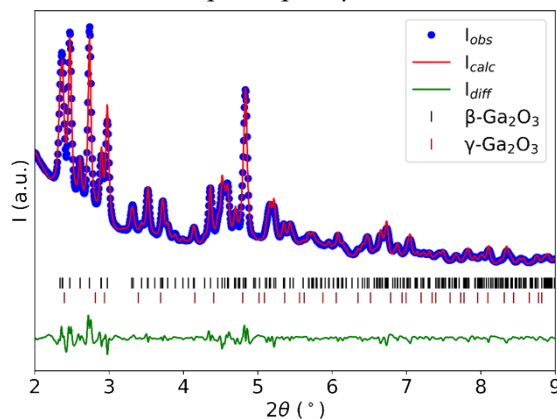

**Figure S32.** Rietveld refinement of the last frame of heating after ramp heating for  $\text{Ga}(\text{NO}_3)_3$  in water at  $400^\circ\text{C}$ . The refinement show phase pure  $\beta\text{-Ga}_2\text{O}_3$ .

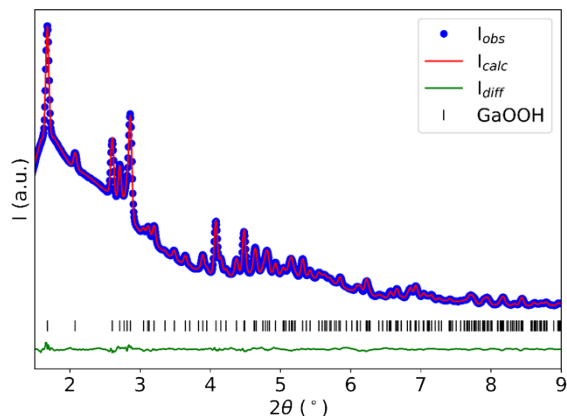

**Figure S33.** Rietveld refinement of the last frame of heating for  $\text{Ga}(\text{NO}_3)_3$  in water with added NaOH at  $200^\circ\text{C}$ . The refinement show phase pure GaOOH.

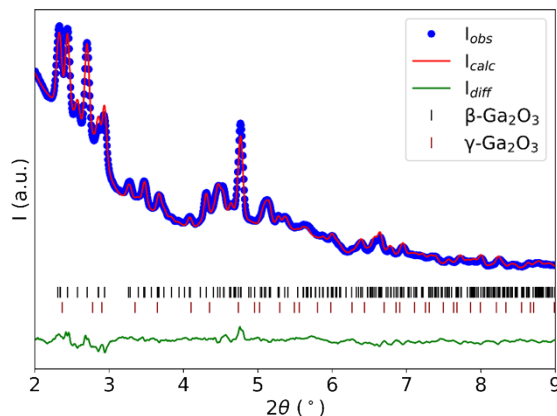

**Figure S36.** Rietveld refinement of the last frame of heating for  $\text{Ga}(\text{NO}_3)_3$  in water with added NaOH at  $350^\circ\text{C}$ . The refinement show phase pure  $\beta\text{-Ga}_2\text{O}_3$ .

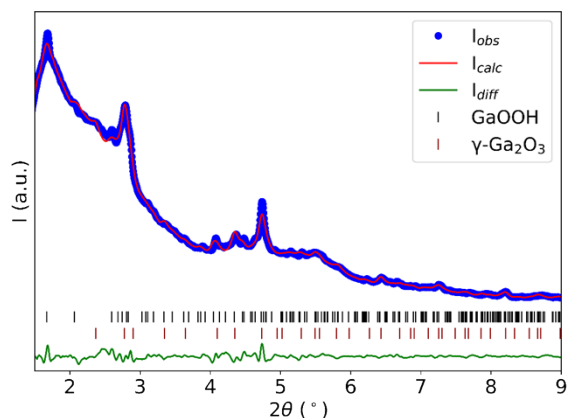

**Figure S34.** Rietveld refinement of the last frame of heating for  $\text{Ga}(\text{NO}_3)_3$  in water with added NaOH at  $250^\circ\text{C}$ . The refinement show a mixture of GaOOH and  $\gamma\text{-Ga}_2\text{O}_3$ .

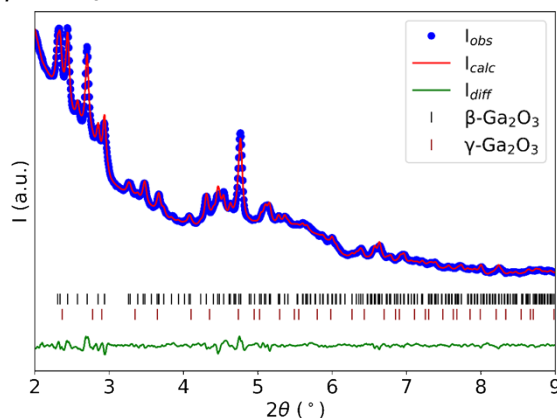

**Figure S37.** Rietveld refinement of the last frame of heating for  $\text{Ga}(\text{NO}_3)_3$  in water with added NaOH at  $400^\circ\text{C}$ . The refinement show phase pure  $\beta\text{-Ga}_2\text{O}_3$ .

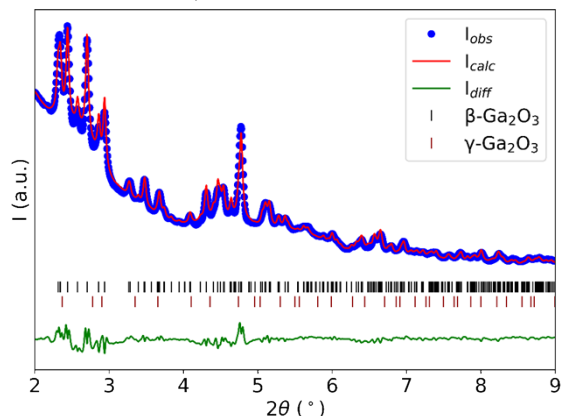

**Figure S35.** Rietveld refinement of the last frame of heating for  $\text{Ga}(\text{NO}_3)_3$  in water with added NaOH at  $300^\circ\text{C}$ . The refinement show phase pure  $\beta\text{-Ga}_2\text{O}_3$ .

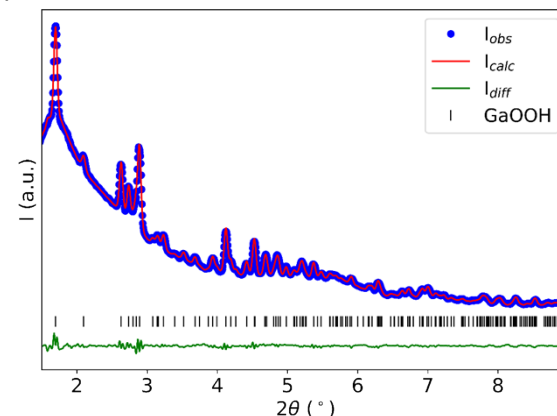

**Figure S38.** Rietveld refinement of the last frame of heating after ramp heating for  $\text{Ga}(\text{NO}_3)_3$  in water with added NaOH at  $400^\circ\text{C}$ . The refinement show phase pure GaOOH.

## Extracted values from Rietveld refinements

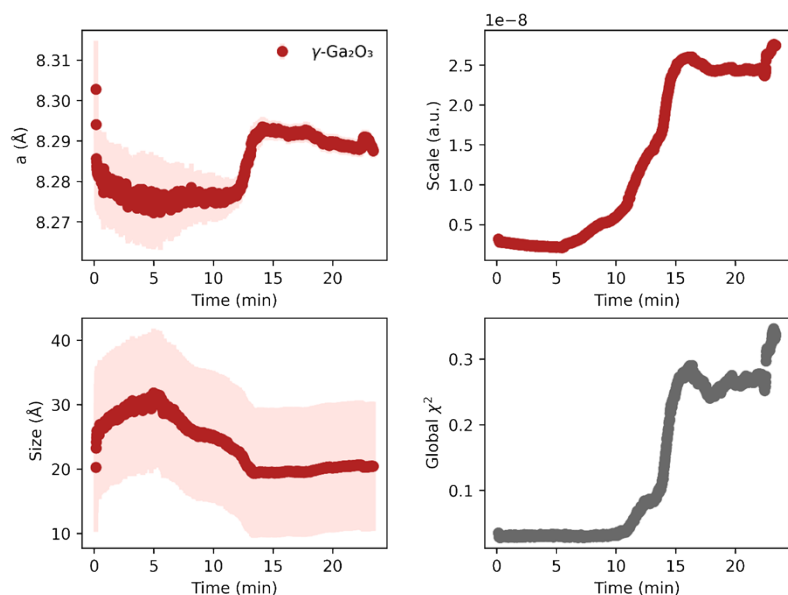

**Figure S39.** Extracted values for the sequential Rietveld refinement of the experiment with fast heating for Ga(NO<sub>3</sub>)<sub>3</sub> in ethanol at 200°C. The sudden shifts in parameters are most likely caused by movement of the particles in the capillary. The shaded area represent the estimated standard deviations.

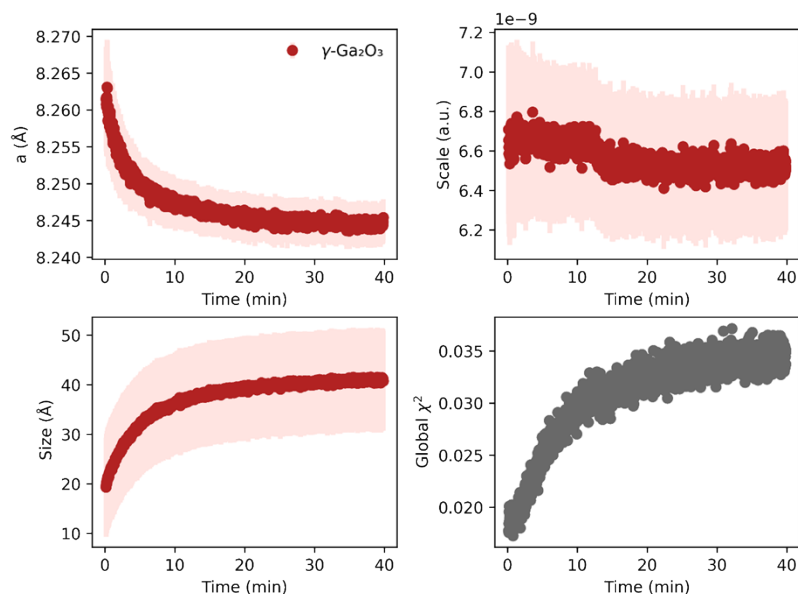

**Figure S40.** Extracted values for the sequential Rietveld refinement of the experiment with fast heating for Ga(NO<sub>3</sub>)<sub>3</sub> in ethanol at 250°C.

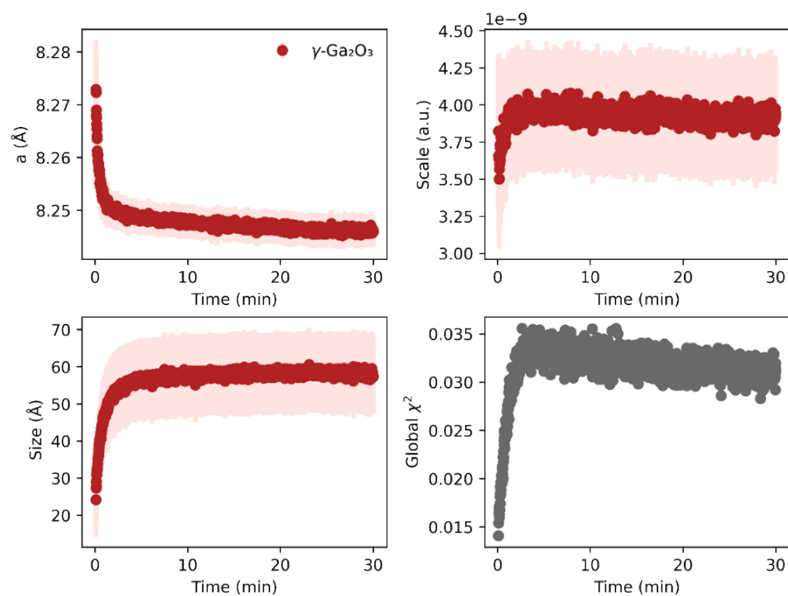

**Figure S41.** Extracted values for the sequential Rietveld refinement of the experiment with fast heating for  $\text{Ga}(\text{NO}_3)_3$  in ethanol at  $300^\circ\text{C}$ .

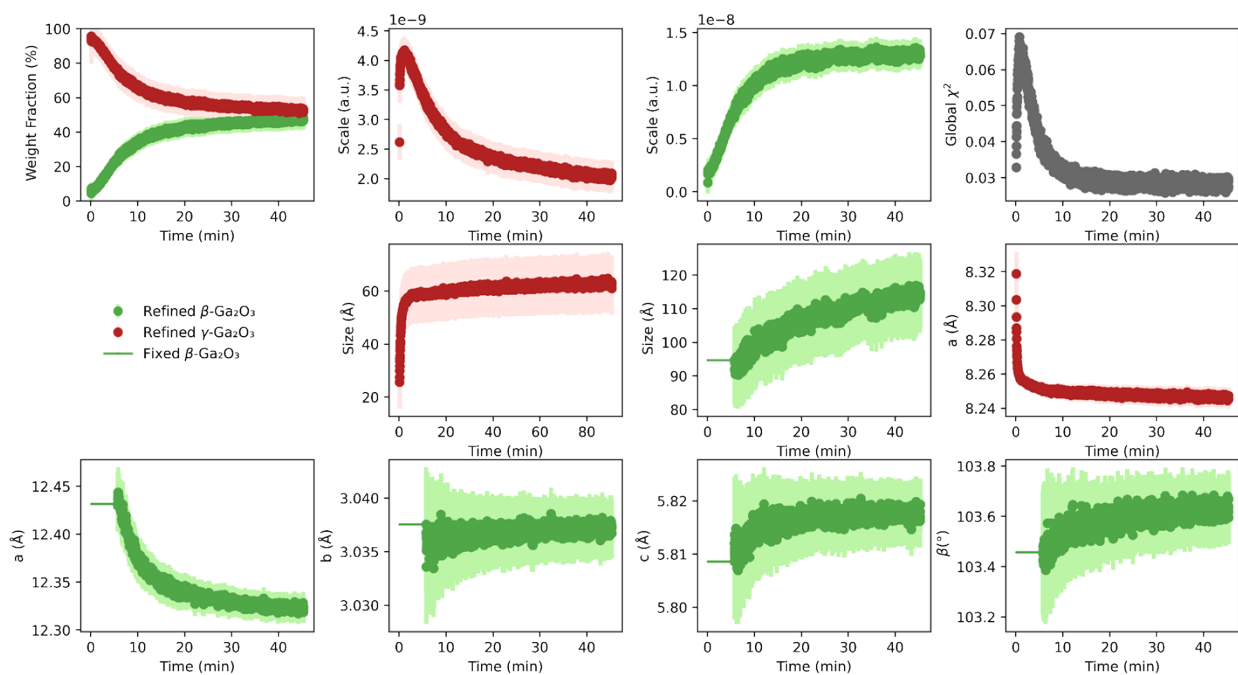

**Figure S42.** Extracted values for the sequential Rietveld refinement of the experiment with fast heating for  $\text{Ga}(\text{NO}_3)_3$  in ethanol at  $350^\circ\text{C}$ .

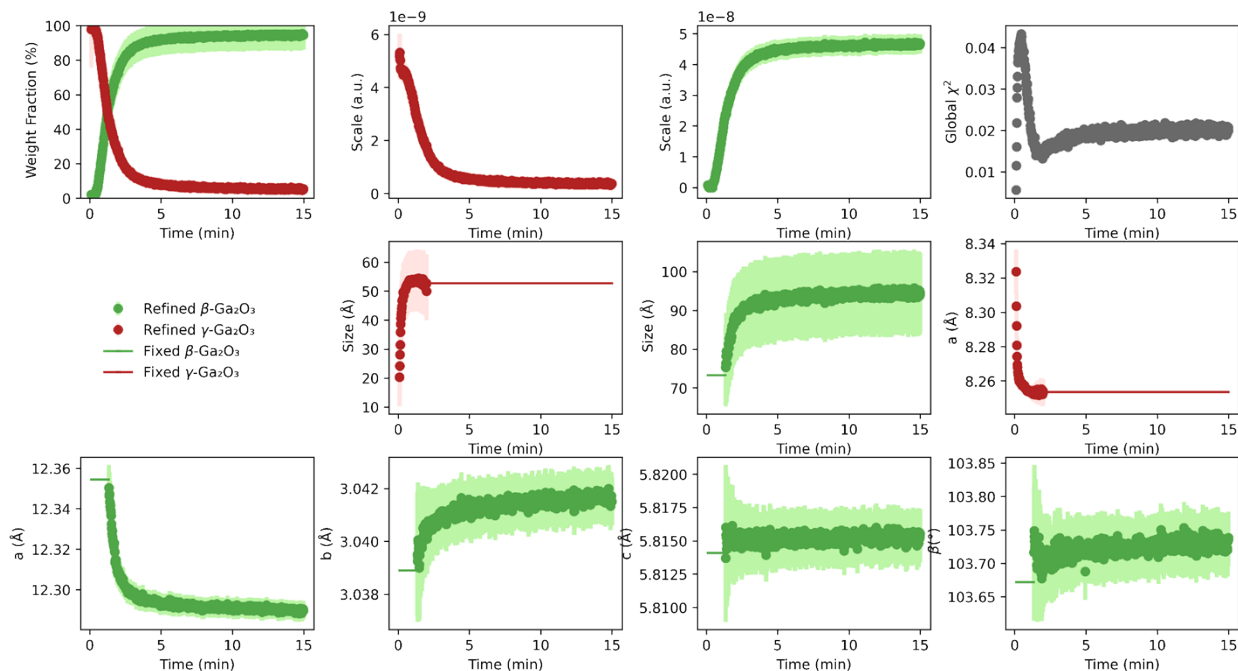

**Figure S43.** Extracted values for the sequential Rietveld refinement of the experiment with fast heating for  $\text{Ga}(\text{NO}_3)_3$  in ethanol at  $400^\circ\text{C}$ .

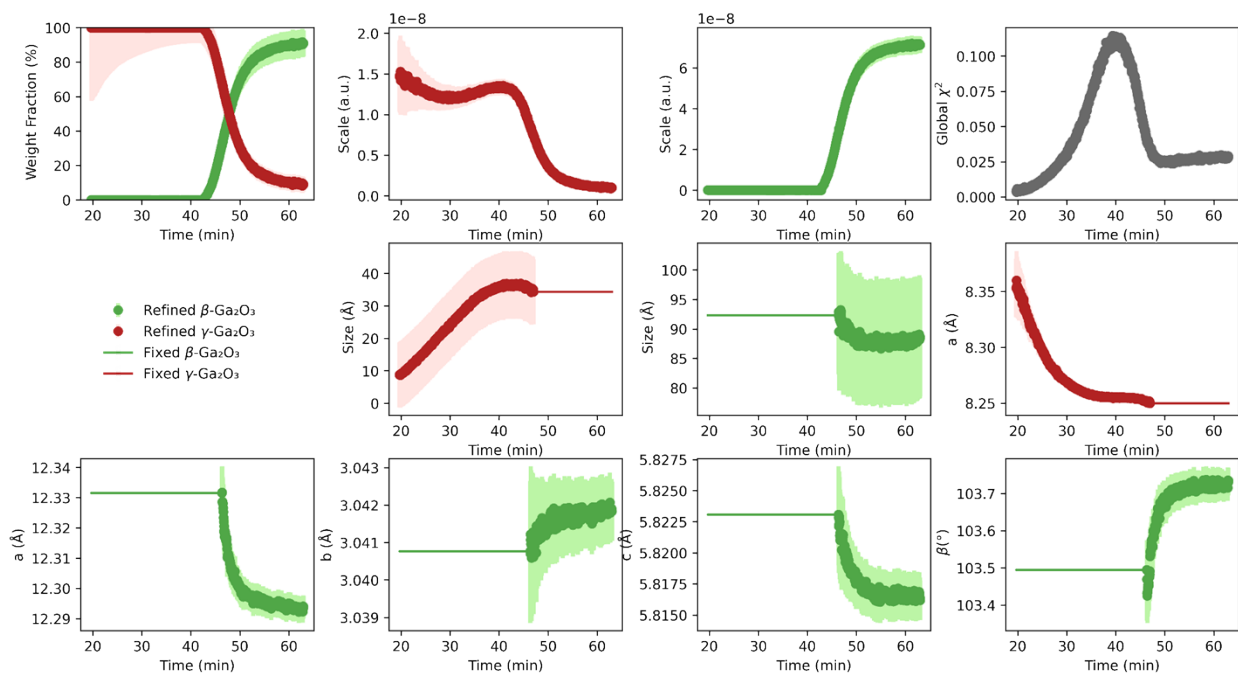

**Figure S44.** Extracted values for the sequential Rietveld refinement of the experiment with slow heating for  $\text{Ga}(\text{NO}_3)_3$  in ethanol to  $400^\circ\text{C}$ .

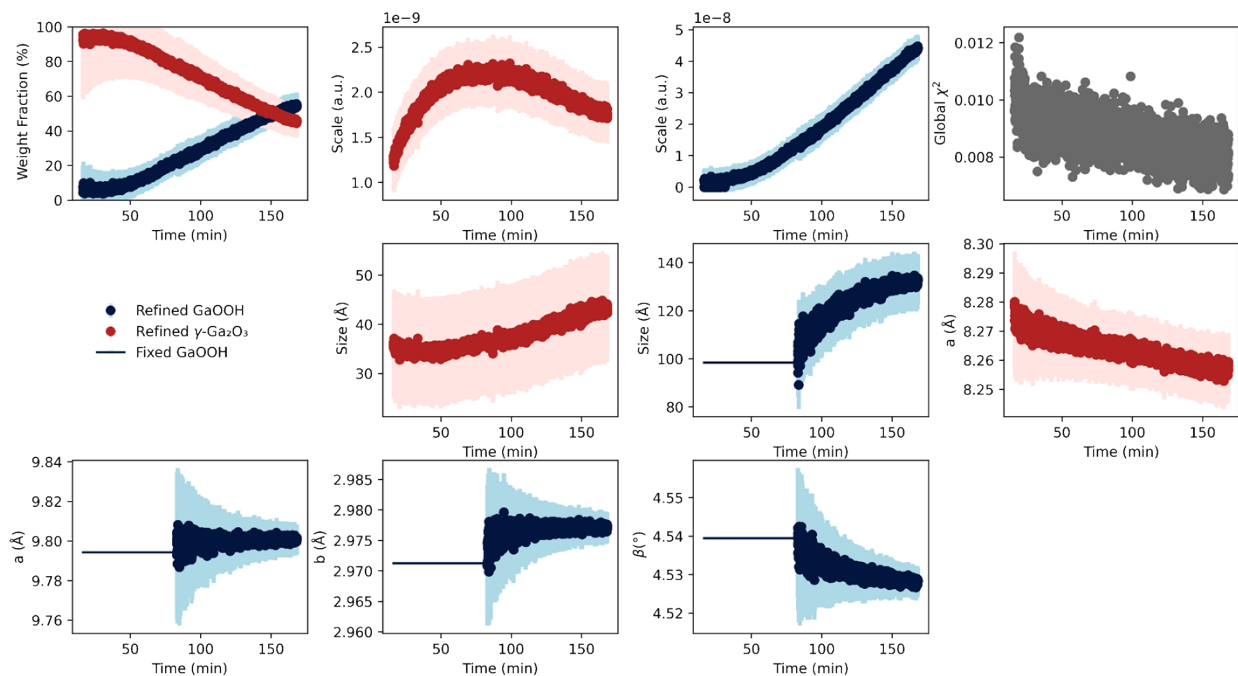

**Figure S45.** Extracted values for the sequential Rietveld refinement of the experiment with fast heating for  $\text{Ga}(\text{NO}_3)_3$  in water at  $200^\circ\text{C}$ .

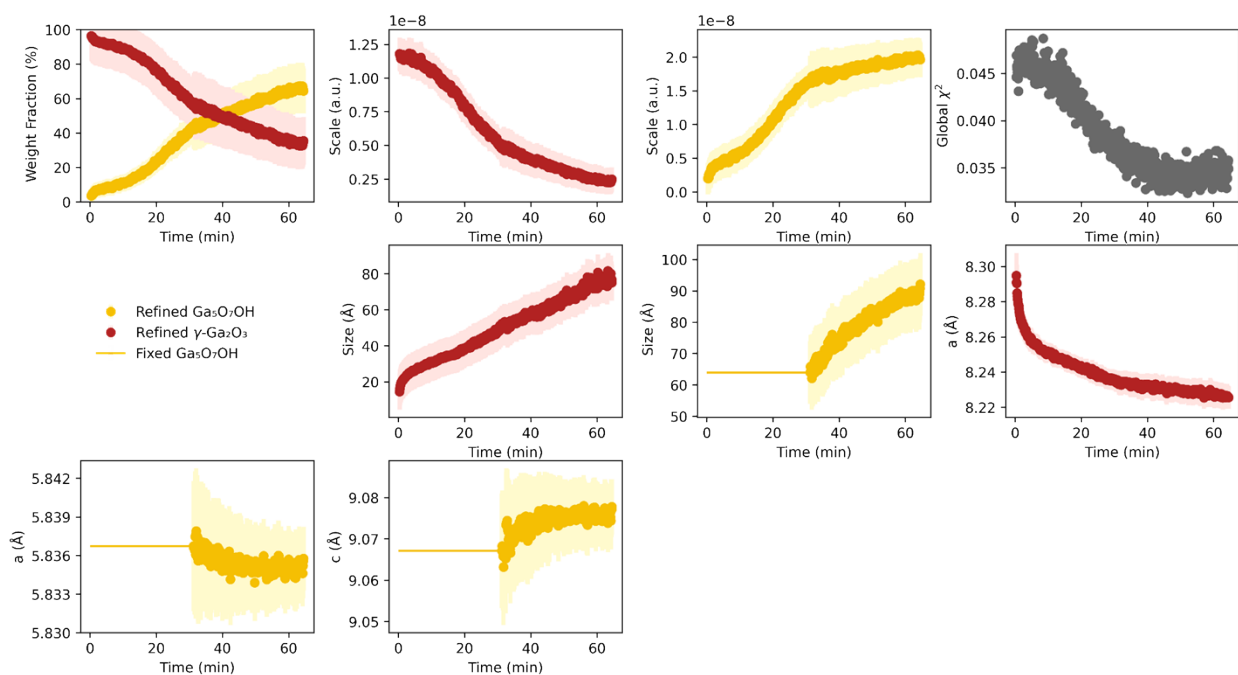

**Figure S46.** Extracted values for the sequential Rietveld refinement of the experiment with fast heating for  $\text{Ga}(\text{NO}_3)_3$  in water at  $250^\circ\text{C}$ .

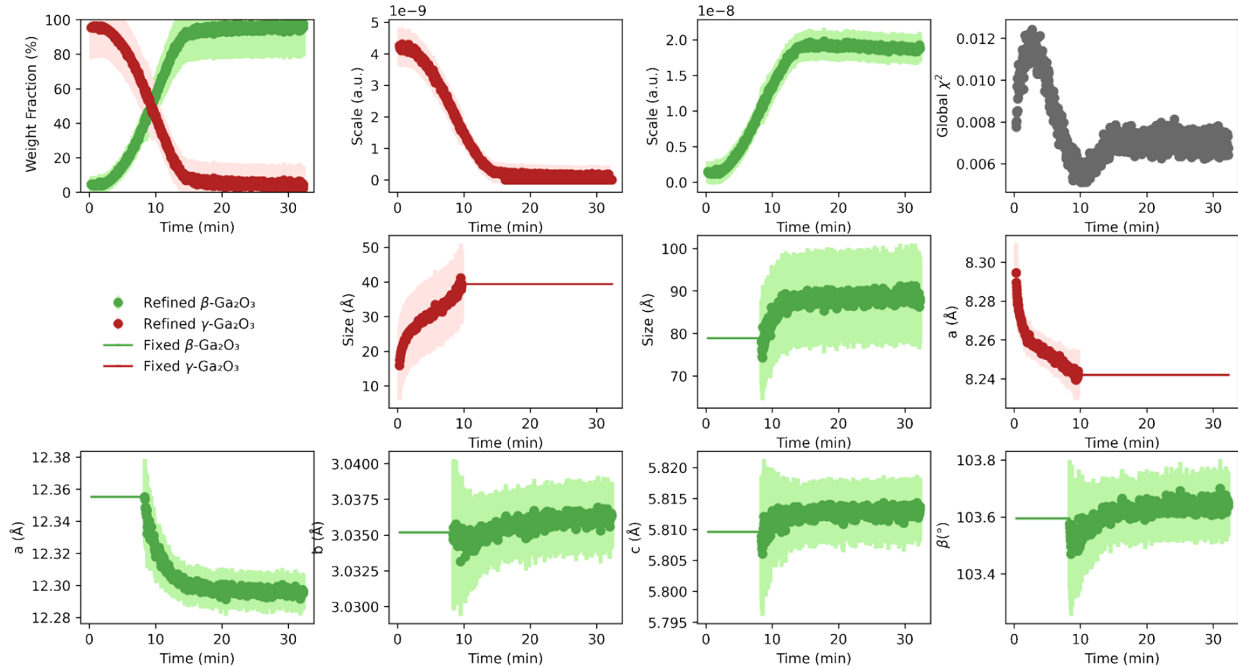

**Figure S47.** Extracted values for the sequential Rietveld refinement of the experiment with fast heating for  $\text{Ga}(\text{NO}_3)_3$  in water at  $300^\circ\text{C}$ .

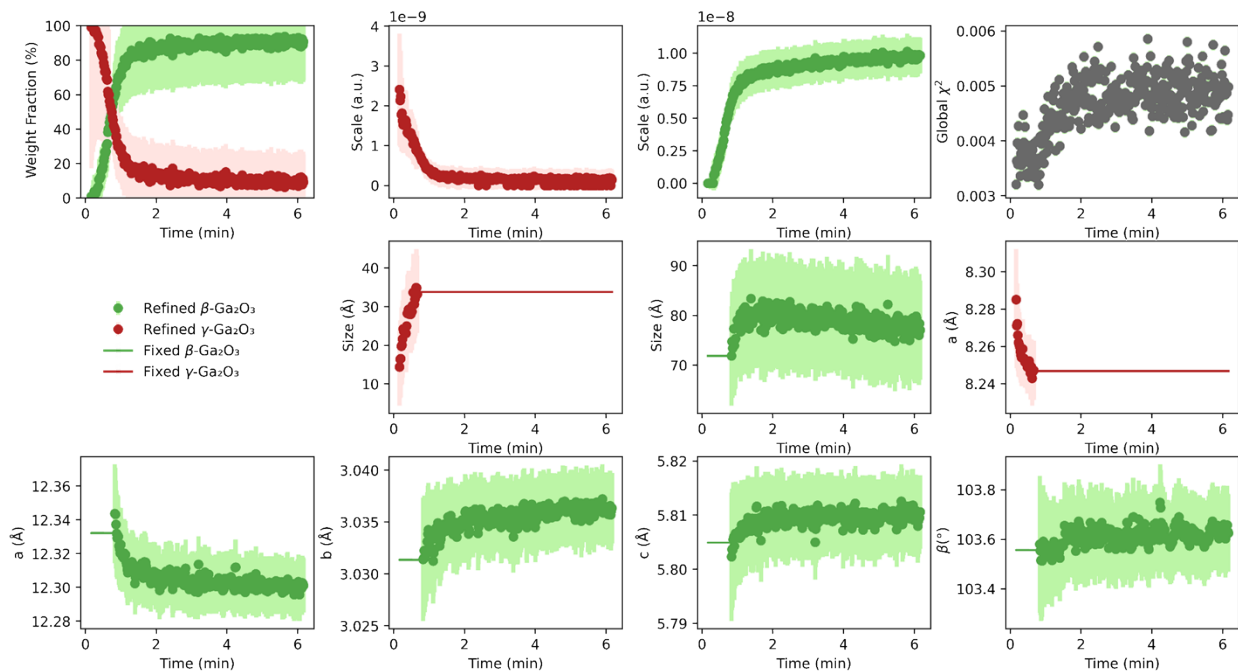

**Figure S48.** Extracted values for the sequential Rietveld refinement of the experiment with fast heating for  $\text{Ga}(\text{NO}_3)_3$  in water at  $350^\circ\text{C}$ .

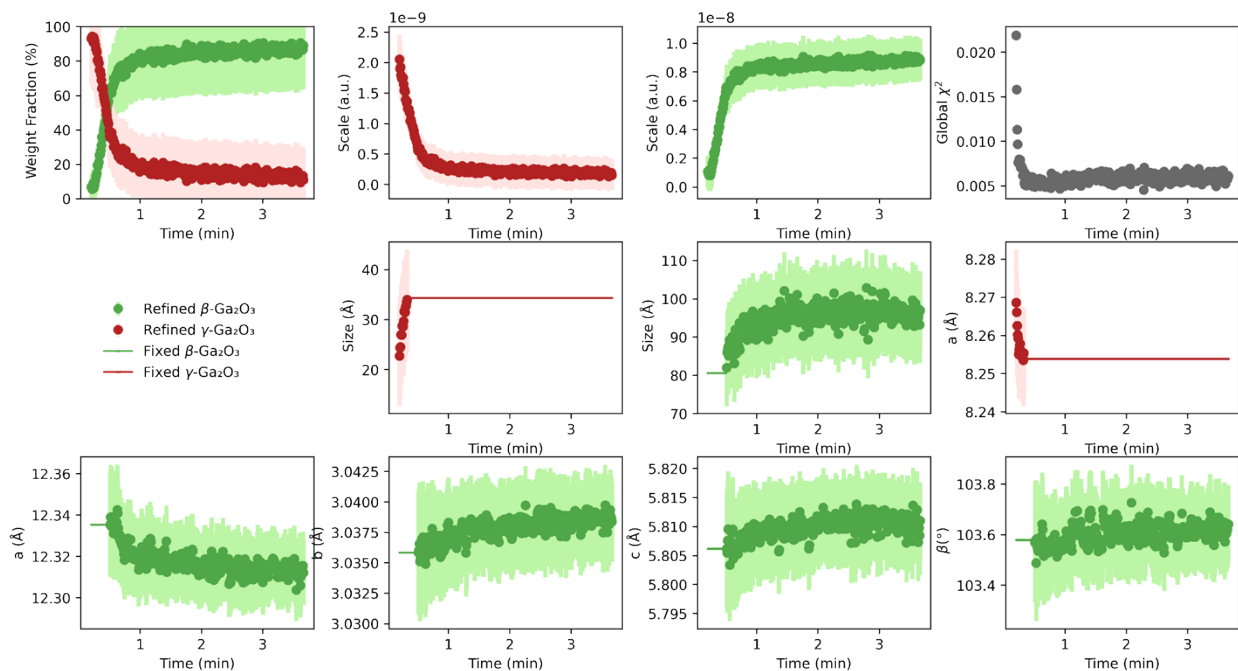

**Figure S49.** Extracted values for the sequential Rietveld refinement of the experiment with fast heating for  $\text{Ga}(\text{NO}_3)_3$  in water at  $400^\circ\text{C}$ .

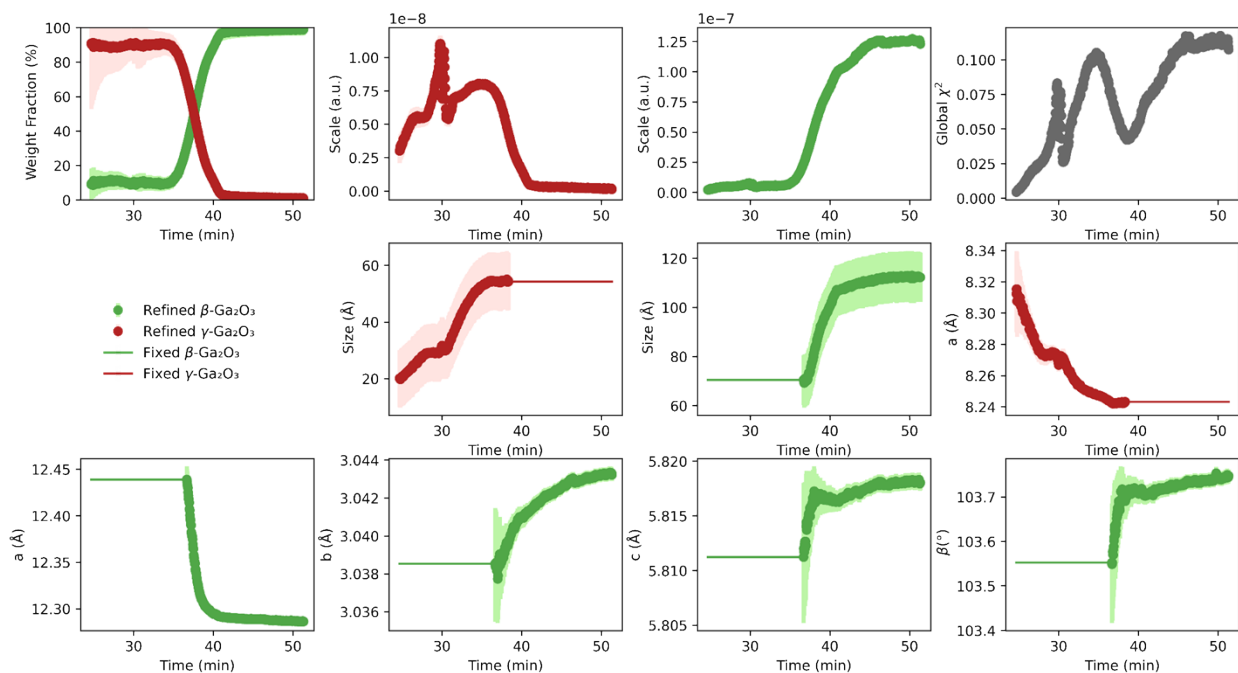

**Figure S50.** Extracted values for the sequential Rietveld refinement of the experiment with slow heating for  $\text{Ga}(\text{NO}_3)_3$  in water to  $400^\circ\text{C}$ .



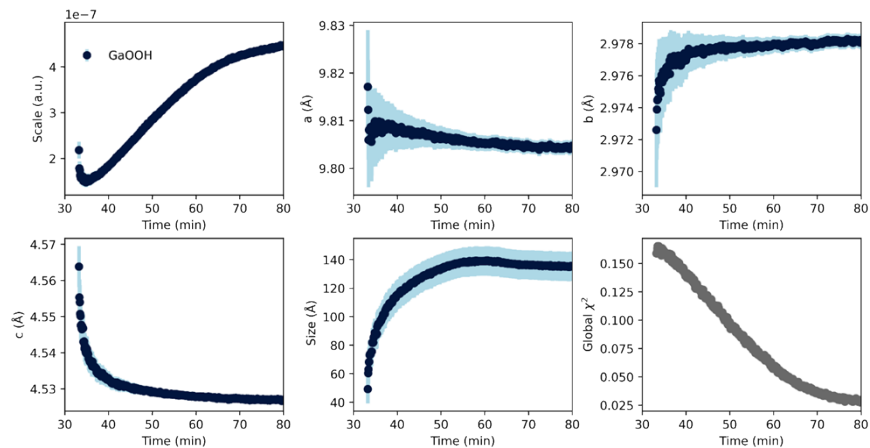

**Figure S51.** Extracted values for the sequential Rietveld refinement of the experiment with fast heating for Ga(NO<sub>3</sub>)<sub>3</sub> in water with added NaOH at 200°C.

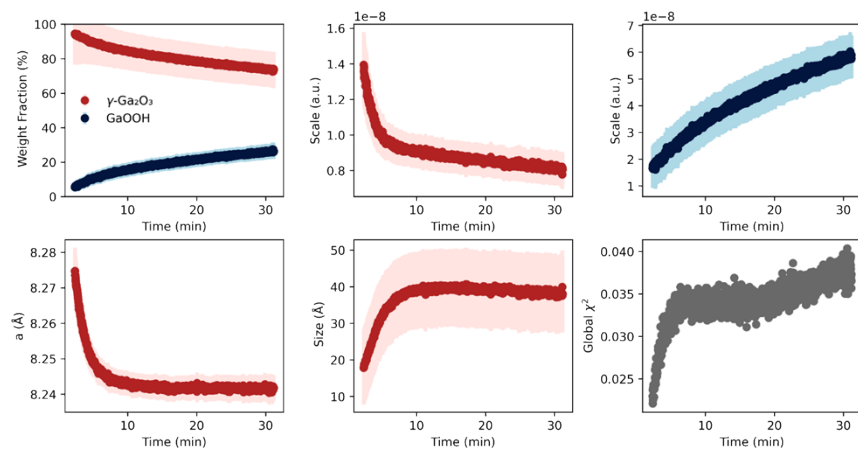

**Figure S52.** Extracted values for the sequential Rietveld refinement of the experiment with fast heating for Ga(NO<sub>3</sub>)<sub>3</sub> in water with added NaOH at 250°C.

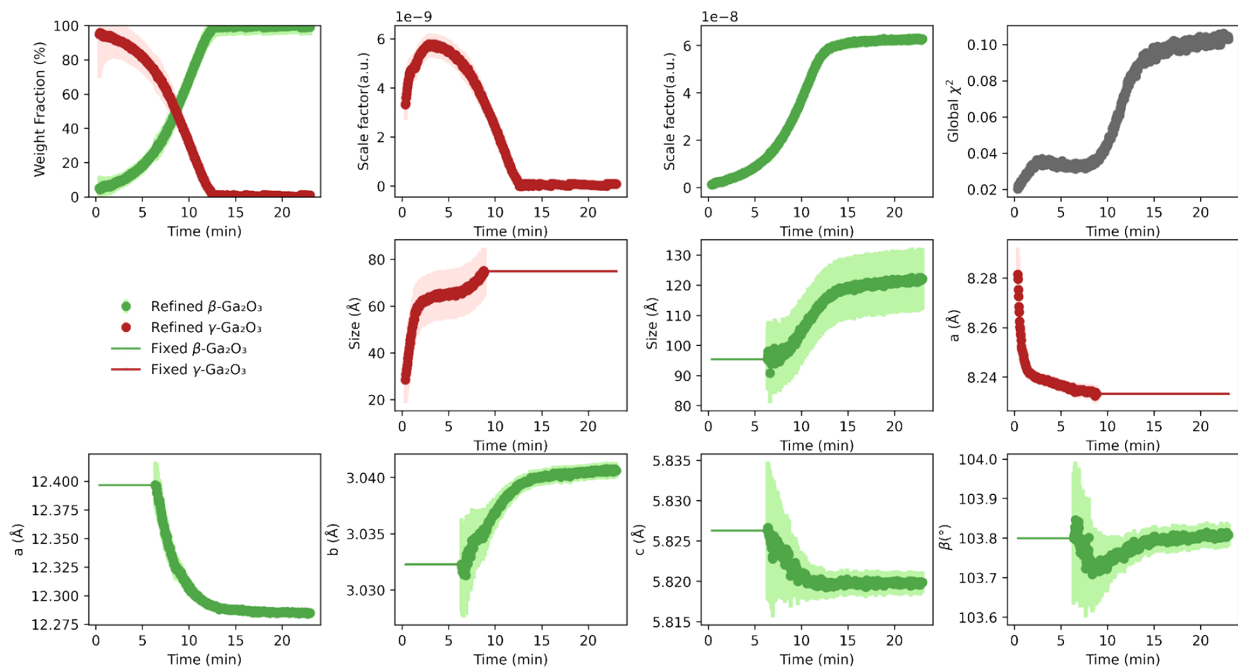

**Figure S53.** Extracted values for the sequential Rietveld refinement of the experiment with fast heating for  $\text{Ga}(\text{NO}_3)_3$  in water with added  $\text{NaOH}$  at  $300^\circ\text{C}$ .

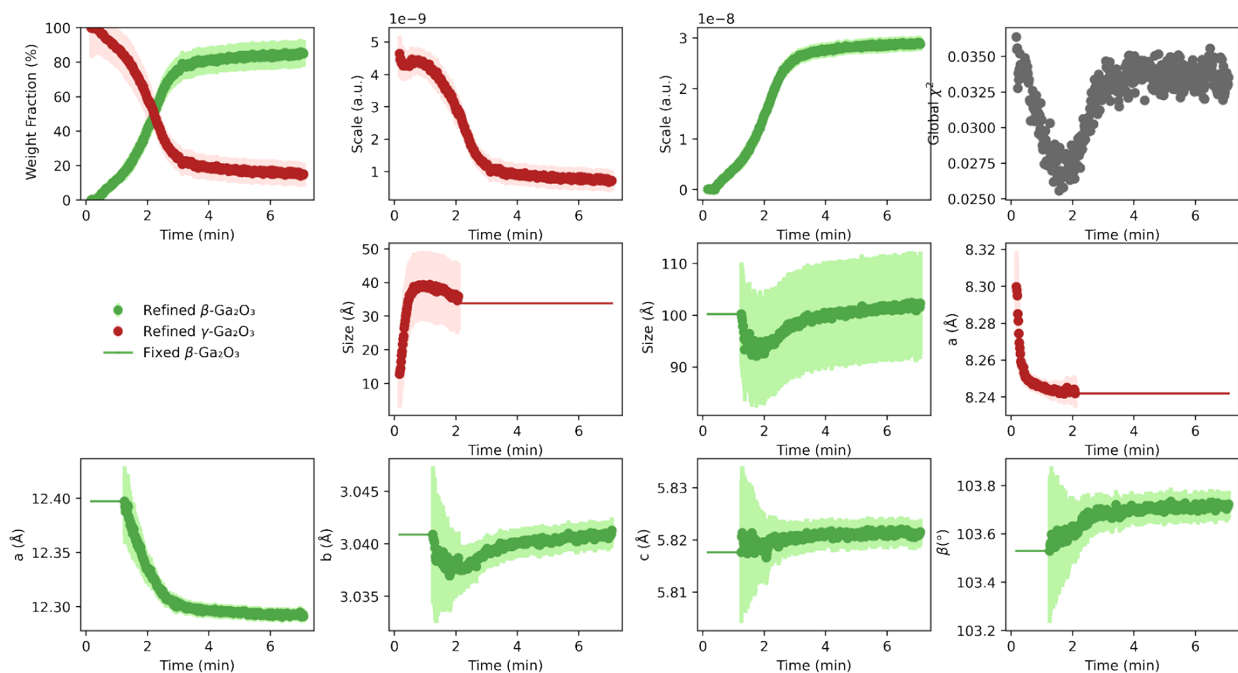

**Figure S54.** Extracted values for the sequential Rietveld refinement of the experiment with fast heating for  $\text{Ga}(\text{NO}_3)_3$  in water with added  $\text{NaOH}$  at  $350^\circ\text{C}$ .

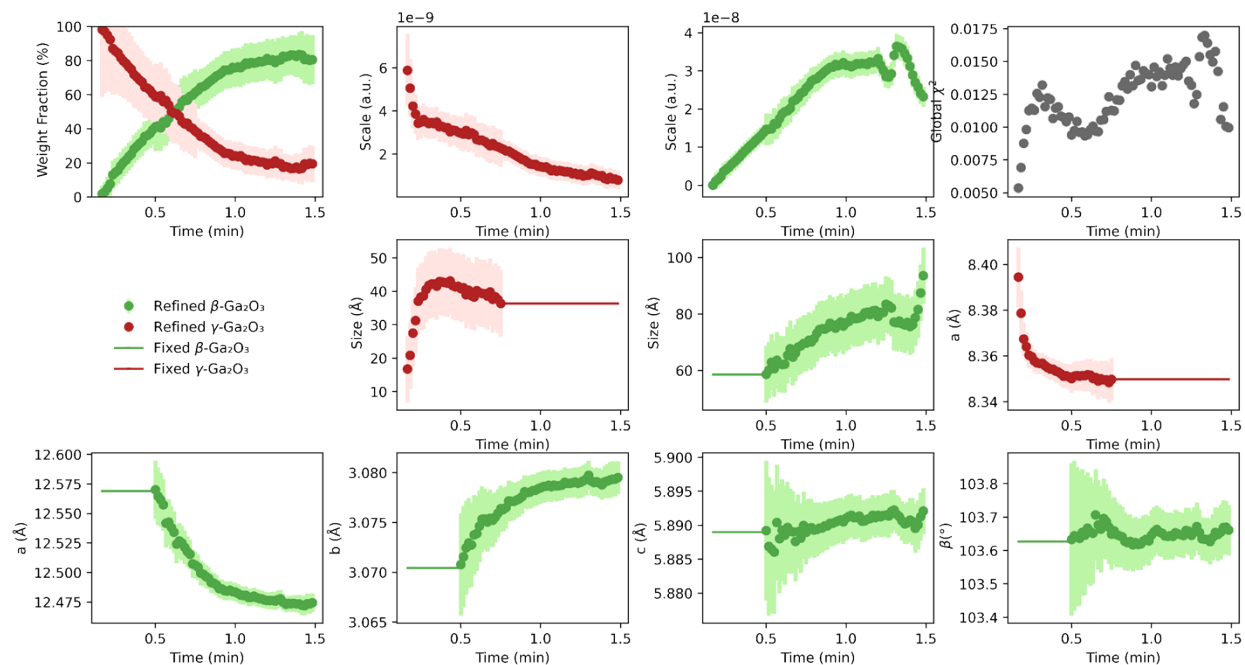

**Figure S55.** Extracted values for the sequential Rietveld refinement of the experiment with fast heating for  $\text{Ga}(\text{NO}_3)_3$  in water with added  $\text{NaOH}$  at  $400^\circ\text{C}$ .

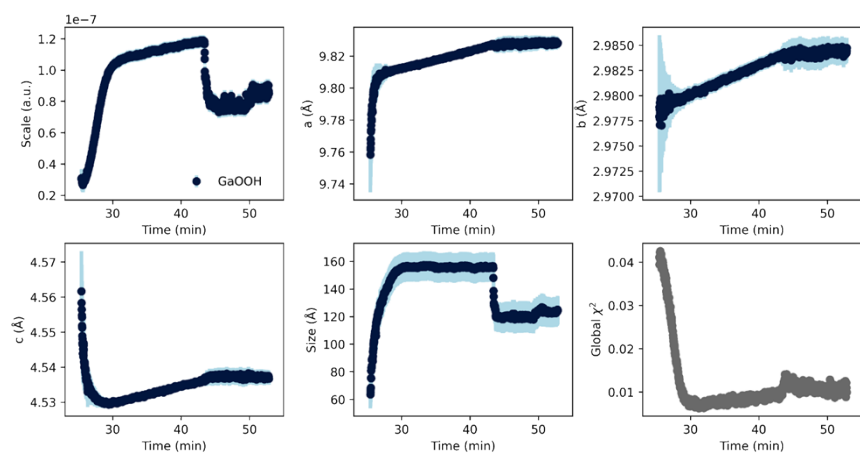

**Figure S56.** Extracted values for the sequential Rietveld refinement of the experiment with slow heating for  $\text{Ga}(\text{NO}_3)_3$  in water with added  $\text{NaOH}$  to  $400^\circ\text{C}$ .

## Refinement of the $\gamma$ -Ga<sub>2</sub>O<sub>3</sub> phase

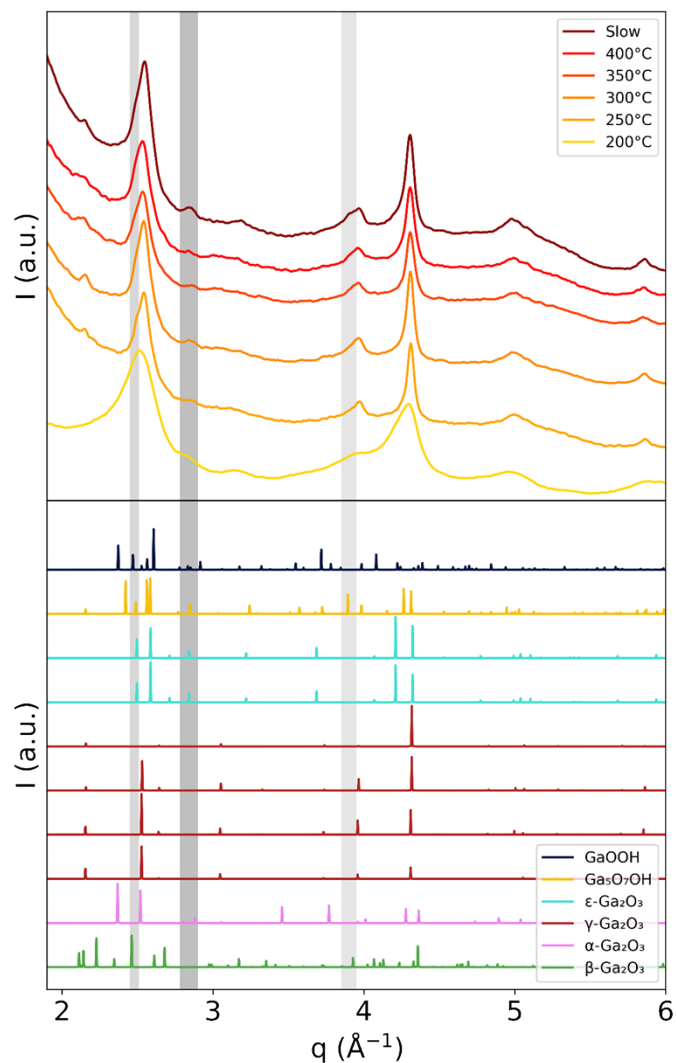

**Figure S57.** Comparison of XRD data for several experiments to reference XRD patterns of GaOOH, Ga<sub>5</sub>O<sub>7</sub>OH, ε-Ga<sub>2</sub>O<sub>3</sub>, γ-Ga<sub>2</sub>O<sub>3</sub>, α-Ga<sub>2</sub>O<sub>3</sub> and β-Ga<sub>2</sub>O<sub>3</sub>.<sup>1-6</sup> The grey markings highlights areas, where γ-Ga<sub>2</sub>O<sub>3</sub> show no peaks. For the light grey the signal is present as shoulders, while a peak not matching γ-Ga<sub>2</sub>O<sub>3</sub> is a shade darker. The different reference patterns illustrate the difference in intensity induced by altering occupancies for γ-Ga<sub>2</sub>O<sub>3</sub>, which do not explain the discrepancies to the recorded patterns.

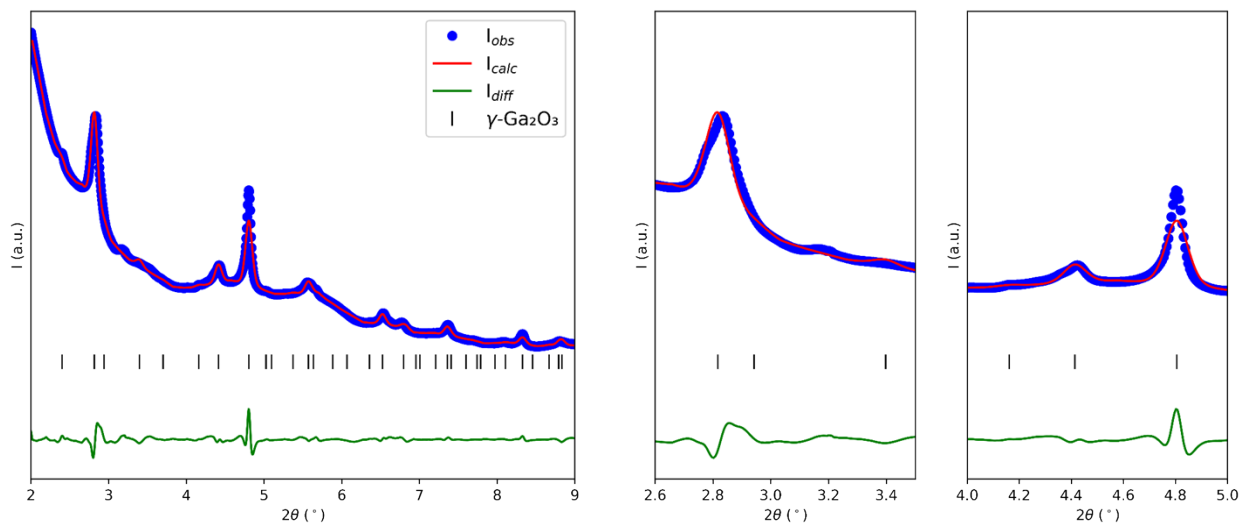

**Figure S58.** Le Bail fit of data from the experiment with fast heating to 250°C and ethanol as solvent. Fit using  $\gamma$ -Ga<sub>2</sub>O<sub>3</sub>, space group Fd $\bar{3}$ m,  $a=8.2285$  Å, size=6.0 nm,  $\chi^2=1.54$

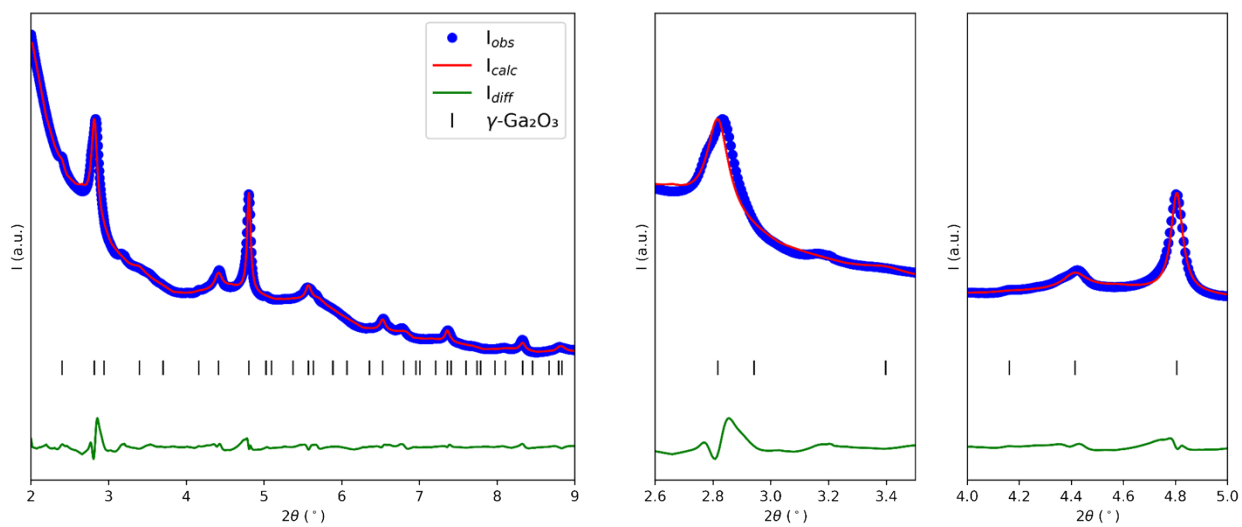

**Figure S59.** Le Bail fit of data from the experiment with fast heating to 250°C and ethanol as solvent. Fit using  $\gamma$ -Ga<sub>2</sub>O<sub>3</sub>, space group Fd $\bar{3}$ m and four anisotropic size broadening parameters,  $a=8.2282$  Å, size=3.2-10 nm,  $\chi^2=1.27$

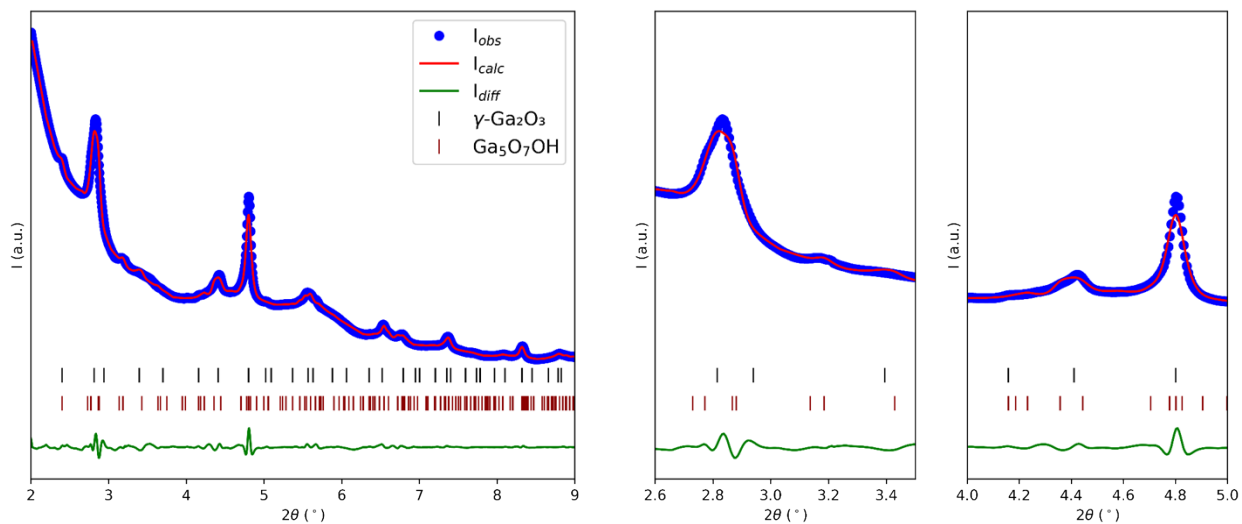

**Figure S60.** Le Bail fit of data from the experiment with fast heating to 250°C and ethanol as solvent. Fit using phase 1 ( $\gamma$ -Ga<sub>2</sub>O<sub>3</sub>): space group Fd $\bar{3}$ m, a=8.235 Å, size=6.0 nm and phase2 (Ga<sub>5</sub>O<sub>7</sub>OH): space group P6<sub>3</sub>mc, a=b=5.823 Å, c=8.915 Å, size=12 nm,  $\chi^2=0.550$

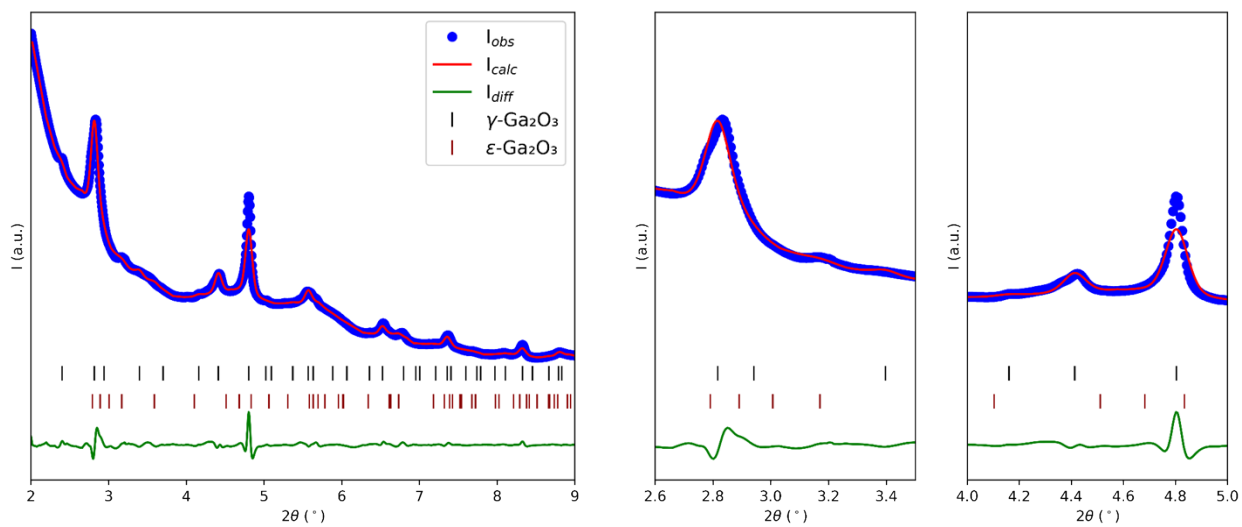

**Figure S61.** Le Bail fit of data from the experiment with fast heating to 250°C and ethanol as solvent. Fit using phase 1 ( $\gamma$ -Ga<sub>2</sub>O<sub>3</sub>): space group Fd $\bar{3}$ m, a=8.231 Å, size=6.0 nm and phase2 ( $\epsilon$ -Ga<sub>2</sub>O<sub>3</sub>): space group P6<sub>3</sub>mc, a=b=2.911 Å, c=9.241 Å, size=22 nm,  $\chi^2=0.736$

## Kinetic analysis of the $\beta$ -Ga<sub>2</sub>O<sub>3</sub> formation

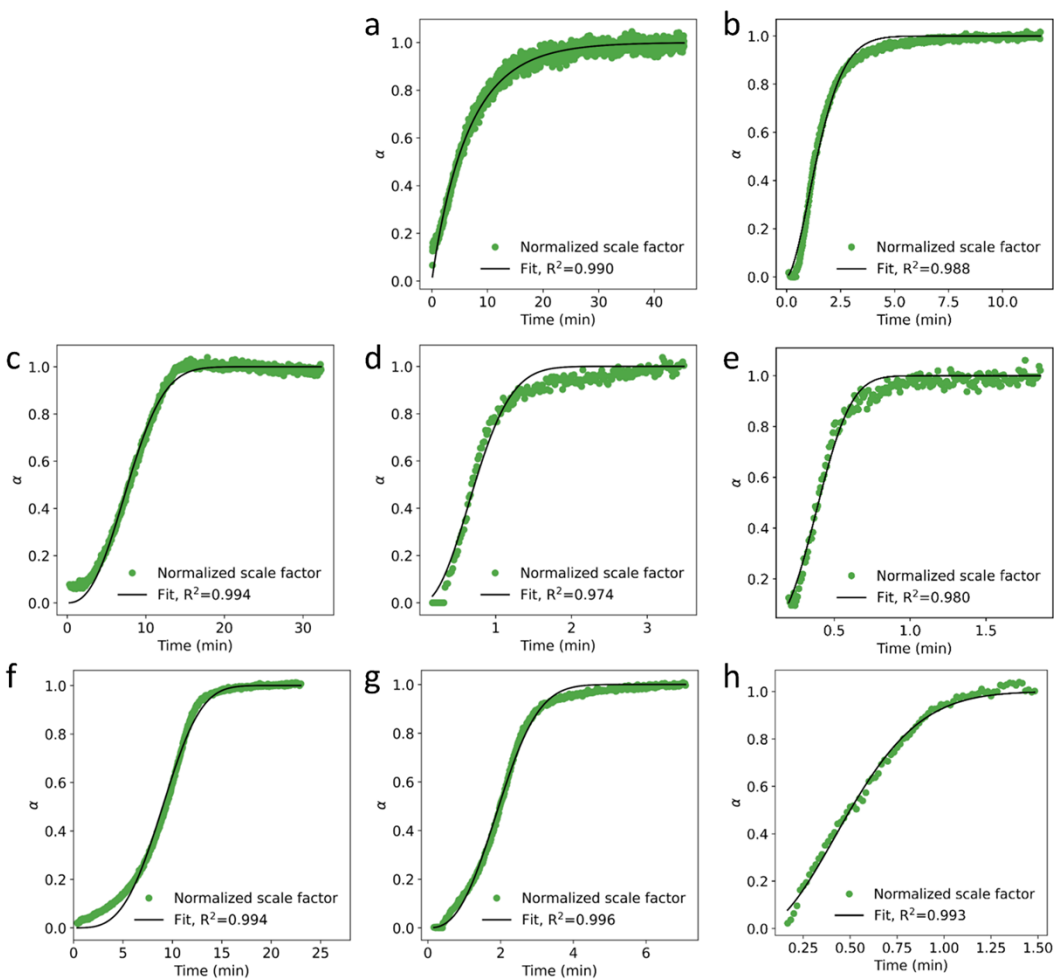

**Figure S62.** Johnson-Mehl-Avrami-Kolmogorov fits using  $\alpha=1-\exp(-(k \cdot t)^n)$  of the normalized scale factors for the experiments fast heating to a) 350 in ethanol, b) 400 in ethanol, c) 300 in water, d) 350 in water, e) 400 in water, f) 300 in water with added NaOH, g) 350 in water with added NaOH and h) 400 in water with added NaOH. The induction time, which is sometimes included as  $t_0$  ( $\alpha=1-\exp(-(k \cdot (t-t_0))^n)$ ), have not been necessary to describe the data. Thus, the induction time is negligible for the reaction.

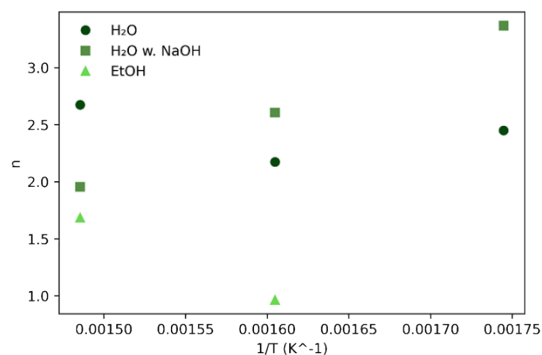

**Figure S63.** Extracted  $n$ -values from the Johnson-Mehl-Avrami-Kolmogorov fits

## References

- 1 H. Y. Playford, A. C. Hannon, E. R. Barney and R. I. Walton, Structures of Uncharacterised Polymorphs of Gallium Oxide from Total Neutron Diffraction, *Chem. - Eur. J.*, 2013, **19**, 2803–2813.
- 2 Helen. Y. Playford, A. C. Hannon, M. G. Tucker, D. M. Dawson, S. E. Ashbrook, R. J. Kastiban, J. Sloan and R. I. Walton, Characterization of Structural Disorder in  $\gamma$ -Ga<sub>2</sub>O<sub>3</sub>, *J. Phys. Chem. C*, 2014, **118**, 16188–16198.
- 3 J. Åhman, G. Svensson and J. Albertsson, A Reinvestigation of  $\beta$ -Gallium Oxide, *Acta Crystallogr., Sect. C: Cryst. Struct. Commun.*, 1996, **52**, 1336–1338.
- 4 M. Marezio and J. P. Remeika, Bond Lengths in the  $\alpha$ -Ga<sub>2</sub>O<sub>3</sub> Structure and the High-Pressure Phase of Ga<sub>2-x</sub>FexO<sub>3</sub>, *J. Chem. Phys.*, 1967, **46**, 1862–1865.
- 5 M. Zinkevich, F. M. Morales, H. Nitsche, M. Ahrens, M. Rühle and F. Aldinger, Microstructural and thermodynamic study of  $\gamma$ -Ga<sub>2</sub>O<sub>3</sub>, *Z. Metallkd.*, 2004, **95**, 756–762.
- 6 S.-J. Li, C. Zheng and K. C. Lohring, Refinement of the crystal structure of gallium oxide hydroxide, GaO(OH), *Z. Kristallogr. - Cryst. Mater.*, 2003, **218**, 11–12.
